# Supplementary material for: Co-delivery of IOX1 and doxorubicin for antibody-independent cancer chemo-immunotherapy
Source: PubMed Central journal article supplement (PMC8065121; doi:10.1038/s41467-021-22407-6), 2021-04-23
Supplement: 41467_2021_22407_MOESM1_ESM.pdf [file 41467_2021_22407_MOESM1_ESM.pdf]

## **Co-delivery of IOX1 and doxorubicin for antibody-independent cancer chemo-immunotherapy**

Jing Liu<sup>1,2‡</sup>, Zhihao Zhao<sup>1,2‡</sup>, Nasha Qiu<sup>1</sup>, Quan Zhou<sup>1</sup>, Guowei Wang<sup>1</sup>, Haiping Jiang<sup>3</sup>, Ying Piao<sup>1,2</sup>, Zhuxian Zhou<sup>1,2</sup>, Jianbin Tang<sup>1</sup>, and Youqing Shen<sup>1,2\*</sup>

<sup>1</sup>Zhejiang Key Laboratory of Smart Biomaterials and Key Laboratory of Biomass Chemical Engineering of Ministry of Education, College of Chemical and Biological Engineering, Zhejiang University, Hangzhou, 310007, China. <sup>2</sup>Hangzhou Global Scientific and Technological Innovation Center, Hangzhou 311215, China. <sup>3</sup>Department of Medical Oncology, The First Affiliated Hospital, School of Medicine, Zhejiang University, Hangzhou, 310003, China.

‡ These authors contributed equally.

\* Correspondence to Youqing Shen (shenyq@zju.edu.cn)

### **Table of contents**

|                                                                                                                                                     |    |
|-----------------------------------------------------------------------------------------------------------------------------------------------------|----|
| Supplementary Fig. 1. The MTT assay curves of IOX1 and IOXL against cancer cells. ....                                                              | 5  |
| Supplementary Fig. 2. Size distribution of pegylated liposomal doxorubicin (PLD, LIBOD <sup>®</sup> ) characterized by DLS. ....                    | 5  |
| Supplementary Fig. 3. The particle sizes and zeta potentials of the mixed liposomes of PLD and IOXL at different molar ratios measured by DLS. .... | 5  |
| Supplementary Fig. 4. The particle size distributions of IOXL in different media for different times at 4°C. ....                                   | 6  |
| Supplementary Fig. 5. The particle size distributions of IPLD in different media for different times at 4°C. ....                                   | 6  |
| Supplementary Fig. 6. The stability of the liposomal formulations. ....                                                                             | 6  |
| Supplementary Fig. 7. The quantification by western blotting of P-gp expression. ....                                                               | 7  |
| Supplementary Fig. 8. Influence of IOX1 on P-gp ATPase activity. ....                                                                               | 7  |
| Supplementary Fig. 9. Intracellular DOX analysis after different treatments in CT26 cells. ....                                                     | 7  |
| Supplementary Fig. 10. Intracellular DOX analysis after different treatments in HCT116 cells. ....                                                  | 8  |
| Supplementary Fig. 11. P-gp activity evaluation using rhodamine 123 (Rh123). ....                                                                   | 8  |
| Supplementary Fig. 12. Intracellular DOX analysis after different treatments in NIH-3T3 cells. ....                                                 | 9  |
| Supplementary Fig. 13. Construction of P-gp-knockdown or -overexpressing CT26 cells. ....                                                           | 9  |
| Supplementary Fig. 14. Intracellular DOX analysis after different treatments in P-gp-knockdown CT26 cells. ....                                     | 10 |
| Supplementary Fig. 15. Intracellular DOX analysis after different treatments in P-gp-overexpressing CT26 cells. ....                                | 10 |

|                                                                                                                                              |    |
|----------------------------------------------------------------------------------------------------------------------------------------------|----|
| Supplementary Fig. 16. The MTT assay curves of DOX, DOX+IOX1, PLD, or IPLD against cancer cells. ....                                        | 11 |
| Supplementary Fig. 17. The MTT assay curves of DOX, DOX+IOX1, PLD, IPLD, or IOX1 alone or its liposomes against NIH-3T3 or HUVEC cells. .... | 11 |
| Supplementary Fig. 18. The MTT assay curves of DNR, EPI, OXA or its combination with IOX1 against CT26 cells. ....                           | 12 |
| Supplementary Fig. 19. Flow cytometry analysis of CRT exposure on CT26 cells.....                                                            | 12 |
| Supplementary Fig. 20. Autophagosome analysis after treatments.....                                                                          | 12 |
| Supplementary Fig. 21. Quantification of HMGB1 release in CT26 cells calculated from CLSM images.....                                        | 13 |
| Supplementary Fig. 22. The quantification by western blotting of p-PERK, p-eIF2 $\alpha$ and membrane CRT expression in CT26 cells. ....     | 13 |
| Supplementary Fig. 23. Flow cytometry analysis and the quantification of CRT exposure in HCT116 cells after treatments. ....                 | 13 |
| Supplementary Fig. 24. ATP secretion of HCT116 cells after treatments.....                                                                   | 14 |
| Supplementary Fig. 25. CLSM images and quantification of the nuclear HMGB1 after treatments. ....                                            | 14 |
| Supplementary Fig. 26. Microscopy images of BMDCs after treatments. ....                                                                     | 14 |
| Supplementary Fig. 27. IOX1 direct effects on DC maturation and cytokine secretion. ....                                                     | 15 |
| Supplementary Fig. 28. Construction of CRT-knockdown CT26 cells. ....                                                                        | 15 |
| Supplementary Fig. 29. DC maturation in CRT-knockdown CT26 cells after treatments. ....                                                      | 15 |
| Supplementary Fig. 30. Membrane PD-L1 in CT26 cells after treatments analyzed by flow cytometry. ....                                        | 16 |
| Supplementary Fig. 31. Membrane PD-L1 in HCT116 cells after treatments analyzed by flow cytometry. ....                                      | 16 |
| Supplementary Fig. 32. PD-L1 expression in HCT116 cells after treating with IOX1.....                                                        | 17 |
| Supplementary Fig. 33. Membrane PD-L1 in MCF-7 cells after treatments analyzed by flow cytometry. ....                                       | 17 |
| Supplementary Fig. 34. The effect of blank liposome on PD-L1 expression in CT26 cells analyzed by flow cytometry.....                        | 17 |
| Supplementary Fig. 35. The total PD-L1 expression of CT26 cells after treatments.....                                                        | 18 |
| Supplementary Fig. 36. Construction of PD-L1-knockdown or -overexpressing CT26 cells.....                                                    | 18 |
| Supplementary Fig. 37. The effects on T cell proliferation of pre-treated PD-L1-knockdown CT26 cells.....                                    | 18 |
| Supplementary Fig. 38. The effects on T cell proliferation of pre-treated PD-L1-overexpressing CT26 cells.....                               | 19 |
| Supplementary Fig. 39. The effects on T cell activity of pre-treated PD-L1-overexpressing CT26 cells.....                                    | 19 |
| Supplementary Fig. 40. IOX1 direct effect on T cell proliferation. ....                                                                      | 19 |
| Supplementary Fig. 41. JMJD1A downstream protein expression in JMJD1A-knockdown CT26 cells.....                                              | 20 |
| Supplementary Fig. 42. JMJD1A downstream protein expression in JMJD1A-knockdown HCT116 cells.....                                            | 20 |
| Supplementary Fig. 43. Effects of $\beta$ -catenin-rescue on the JMJD1A downstream protein                                                   |    |

|                                                                                                                                                                              |    |
|------------------------------------------------------------------------------------------------------------------------------------------------------------------------------|----|
| expression in JMJD1A-knockdown CT26 cells. ....                                                                                                                              | 21 |
| Supplementary Fig. 44. Flow cytometry analysis of intracellular DOX accumulation in control or JMJD1A-knockdown CT26 cells. ....                                             | 21 |
| Supplementary Fig. 45. Flow cytometry analysis of intracellular DOX accumulation in control or JMJD1A-knockdown HCT116 cells.....                                            | 22 |
| Supplementary Fig. 46. Membrane PD-L1 in control or JMJD1A-knockdown CT26 cells after treatments analyzed by flow cytometry. ....                                            | 22 |
| Supplementary Fig. 47. Membrane PD-L1 in control or JMJD1A-knockdown HCT116 cells after treatments analyzed by flow cytometry. ....                                          | 23 |
| Supplementary Fig. 48. IOX1 effect on the P-gp and PD-L1 expression in JMJD1A-knockdown CT26 cells.....                                                                      | 23 |
| Supplementary Fig. 49. IOX1 effect on the P-gp and PD-L1 expression in JMJD1A-knockdown HCT116 cells.....                                                                    | 23 |
| Supplementary Fig. 50. IOX1 treatment reduces the stability of JMJD1A protein.....                                                                                           | 24 |
| Supplementary Fig. 51. JMJD1A and $\beta$ -catenin levels in IOX1-treated CT26 cells.....                                                                                    | 25 |
| Supplementary Fig. 52. JMJD1A and $\beta$ -catenin levels in IOX1-treated HCT116 cells. ....                                                                                 | 25 |
| Supplementary Fig. 53. JMJD1A and P-gp levels in untreated murine cell lines. ....                                                                                           | 26 |
| Supplementary Fig. 54. JMJD1A and P-gp levels in untreated human cell lines.....                                                                                             | 26 |
| Supplementary Fig. 55. JMJD1A expression in untreated CT26 cells or T lymphocytes.....                                                                                       | 26 |
| Supplementary Fig. 56. The blood clearance curves in BALB/c mice. ....                                                                                                       | 27 |
| Supplementary Fig. 57. Biodistribution of IOX1 and DOX in s.c. CT26 tumour-bearing mice.....                                                                                 | 27 |
| Supplementary Fig. 58. Images of the tumours from the treated s.c. 80 mm <sup>3</sup> CT26 tumour-bearing BALB/c mice in Figs. 5a-e. ....                                    | 27 |
| Supplementary Fig. 59. Photographs of the s.c. 80 mm <sup>3</sup> CT26 tumour-bearing BALB/c mice treated with IPLD during the experiment. ....                              | 28 |
| Supplementary Fig. 60. The follow-up tracking of the IPLD-treated s.c. 80 mm <sup>3</sup> CT26 tumour-bearing BALB/c mice.....                                               | 28 |
| Supplementary Fig. 61. Blood biochemistry of the BALB/c mice after different treatments.....                                                                                 | 29 |
| Supplementary Fig. 62. PLD treatment of s.c. JMJD1A-knockdown CT26 tumours.....                                                                                              | 29 |
| Supplementary Fig. 63. Photographs of the s.c. 80 mm <sup>3</sup> JMJD1A-knockdown CT26 tumour-bearing BALB/c mice treated with PLD during the experiment. ....              | 30 |
| Supplementary Fig. 64. JMJD1A, $\beta$ -catenin, P-gp and PD-L1 expression in the IOXL-treated CT26 tumours or JMJD1A-knockdown CT26 tumours. ....                           | 30 |
| Supplementary Fig. 65. Images and the average tumour weights of the tumours from the treated s.c. 80 mm <sup>3</sup> CT26 tumour-bearing BALB/c nude mice in Fig. 5h. ....   | 31 |
| Supplementary Fig. 66. The individual tumour growth curves of the s.c. 80 mm <sup>3</sup> CT26 tumour-bearing nude mice after treatments.....                                | 31 |
| Supplementary Fig. 67. Photographs of the s.c. 350 mm <sup>3</sup> CT26 tumour-bearing BALB/c mice treated with IPLD during the experiment. ....                             | 32 |
| Supplementary Fig. 68. The follow-up tracking of the IPLD-treated s.c. 350 mm <sup>3</sup> CT26 tumour-bearing BALB/c mice.....                                              | 32 |
| Supplementary Fig. 69. Flow cytometric quantification of intratumoural CD3 <sup>+</sup> T cells in the treated s.c. 80 mm <sup>3</sup> CT26 tumour-bearing BALB/c mice. .... | 33 |
| Supplementary Fig. 70. Flow cytometric quantification of splenocytes' CD3 <sup>+</sup> CD8 <sup>+</sup> T cells in                                                           |    |

|                                                                                                                                                                                                                   |    |
|-------------------------------------------------------------------------------------------------------------------------------------------------------------------------------------------------------------------|----|
| treated s.c. 80 mm <sup>3</sup> CT26 tumour-bearing BALB/c mice. ....                                                                                                                                             | 33 |
| Supplementary Fig. 71. Flow cytometry analysis and quantification of splenocytes' Treg cells in the treated s.c. 80 mm <sup>3</sup> CT26 tumour-bearing BALB/c mice.....                                          | 33 |
| Supplementary Fig. 72. Flow cytometry analysis and quantification of CTLA-4 expression in intratumoural Treg cells in the treated s.c. 80 mm <sup>3</sup> CT26 tumour-bearing BALB/c mice.....                    | 34 |
| Supplementary Fig. 73. Flow cytometry analysis and quantification of tumour associated M2 macrophages in the treated s.c. 80 mm <sup>3</sup> CT26 tumour-bearing BALB/c mice. ....                                | 34 |
| Supplementary Fig. 74. Western blotting images and their quantification of PD-L1 expression in pancreas in the s.c. 80 mm <sup>3</sup> CT26 tumour-bearing BALB/c mice after different treatments.....            | 34 |
| Supplementary Fig. 75. Western blotting images and their quantification of PD-L1 expression in lungs in the s.c. 80 mm <sup>3</sup> CT26 tumour-bearing BALB/c mice after different treatments.....               | 35 |
| Supplementary Fig. 76. Flow cytometry analysis of intratumour CD8 <sup>+</sup> PD-L1 <sup>+</sup> T cells in the s.c. 80 mm <sup>3</sup> CT26 tumour-bearing BALB/c mice after different treatments. ....         | 35 |
| Supplementary Fig. 77. Images of the rechallenged tumours harvested on the indicated days or at the experimental endpoint (Day 60) from the s.c. CT26 rechallenged tumour-bearing BALB/c mice in Figs. 7a-c. .... | 35 |
| Supplementary Fig. 78. In vivo bioluminescence imaging of the lungs in anaesthetized mice immediately after i.v. injection of <sup>Luci</sup> CT26 cells.....                                                     | 36 |
| Supplementary Fig. 79. The follow-up tracking via in vivo bioluminescence imaging and the survival of the <sup>Luci</sup> CT26-rechallenged BALB/c mice. ....                                                     | 36 |
| Supplementary Fig. 80. Flow cytometry analysis of splenocytes' CD4 <sup>+</sup> CD44 <sup>+</sup> CD122 <sup>+</sup> T cells in the treated s.c. 80 mm <sup>3</sup> CT26 tumour-bearing BALB/c mice.....          | 36 |
| Supplementary Fig. 81. The individual tumour growth curves of the 4T1 orthotopic tumour-bearing BALB/c mice after treatments. ....                                                                                | 37 |
| Supplementary Fig. 82. The average numbers of lung metastatic nodules in the treated dual 4T1 tumour-bearing BALB/c mice. ....                                                                                    | 37 |
| Supplementary Fig. 83. Body weight changes of the mice after treatments. ....                                                                                                                                     | 37 |
| Supplementary Fig. 84. Gating strategies for flow cytometry.....                                                                                                                                                  | 38 |
| Supplementary Table 1. Primers (5'-3') used in this study.....                                                                                                                                                    | 40 |

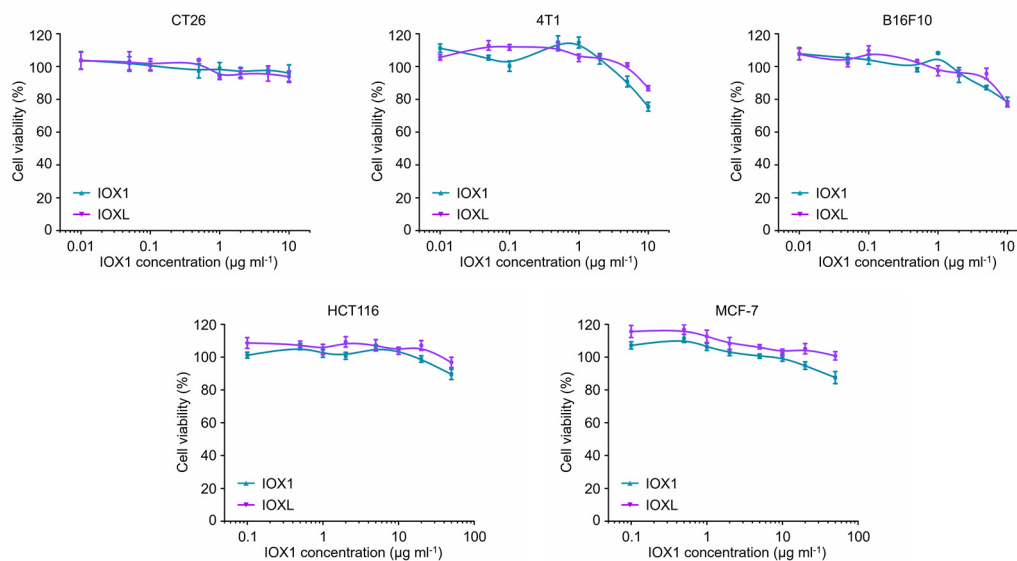

**Supplementary Fig. 1. The MTT assay curves of IOX1 and IOXL against cancer cells. 48 h incubation;  $n = 3$  independent experiments. Data represent mean  $\pm$  SD. Source data are provided as a Source Data file.**

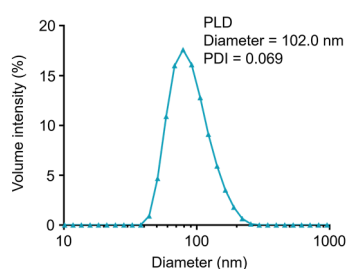

**Supplementary Fig. 2. Size distribution of pegylated liposomal doxorubicin (PLD, LIBOD<sup>®</sup>) characterized by DLS. The experiment was repeated independently three times to confirm the results. Source data are provided as a Source Data file.**

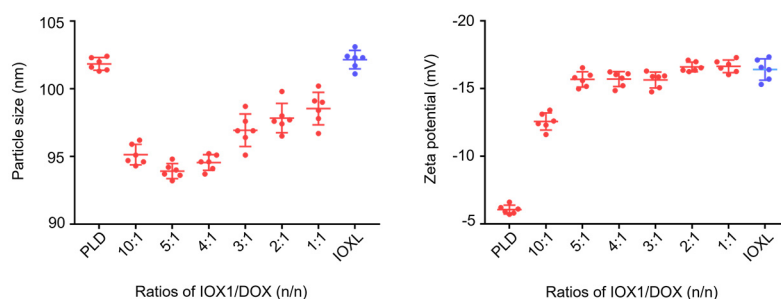

**Supplementary Fig. 3. The particle sizes and zeta potentials of the mixed liposomes of PLD and IOXL at different molar ratios measured by DLS.  $n = 6$  independent samples. Data represent mean  $\pm$  SD. Source data are provided as a Source Data file.**

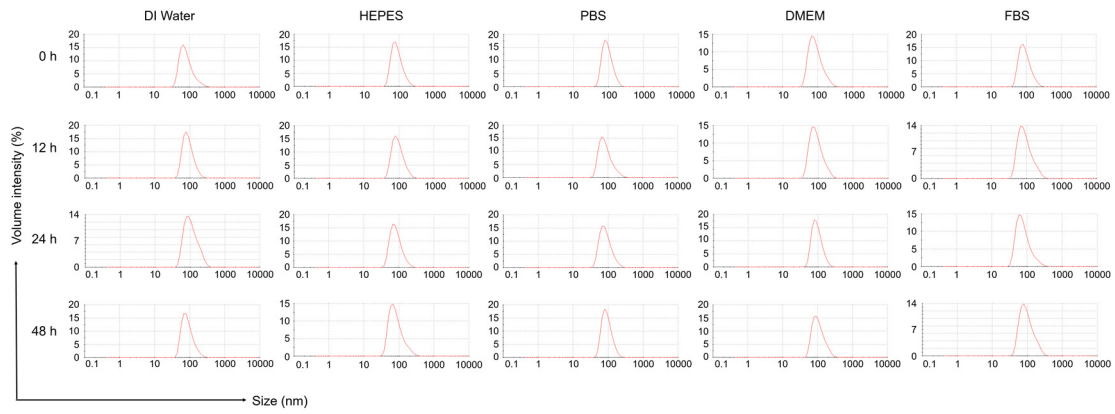

**Supplementary Fig. 4.** The particle size distributions of IOXL in different media for different times at 4°C. The experiment was repeated independently three times to confirm the results.

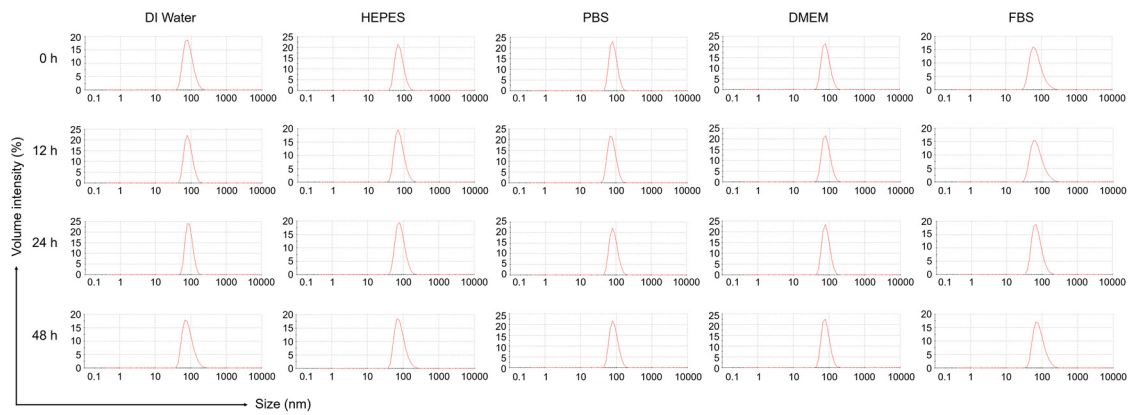

**Supplementary Fig. 5.** The particle size distributions of IPLD in different media for different times at 4°C. The experiment was repeated independently three times to confirm the results.

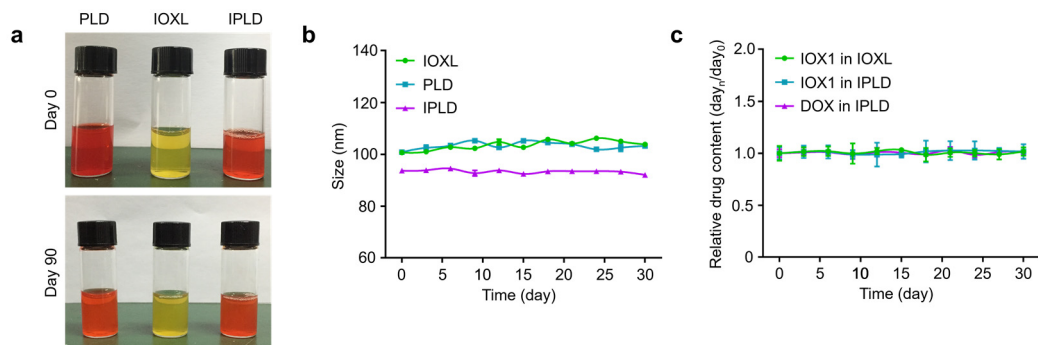

**Supplementary Fig. 6.** The stability of the liposomal formulations. **a**, The photographs of PLD, IOXL, and IPLD solutions at day 0 or after storing at 4°C for 90 days. **b**, The stability of each formulation during 30 days. **c**, The stability of IOX1 or DOX in each formulation during 30 days.  $n = 3$  independent samples. Data represent mean  $\pm$  SD. Source data are provided as a Source Data file.

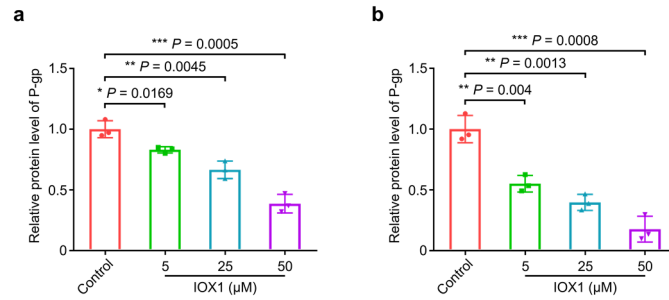

**Supplementary Fig. 7. The quantification by western blotting of P-gp expression.** **a**, CT26 or **b**, HCT116 cells were treated with IOX1 (5, 25, or 50 μM) for 24 h.  $n = 3$  independent experiments. Data represent mean  $\pm$  SD. Two-tailed Student's  $t$ -test. \*  $P < 0.05$ , \*\*  $P < 0.01$ , \*\*\*  $P < 0.001$ . See Fig. 2c in the text for images and other conditions. Source data are provided as a Source Data file.

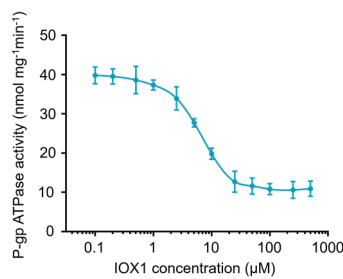

**Supplementary Fig. 8. Influence of IOX1 on P-gp ATPase activity.**  $n = 3$  independent experiments. Data represent mean  $\pm$  SD. Source data are provided as a Source Data file.

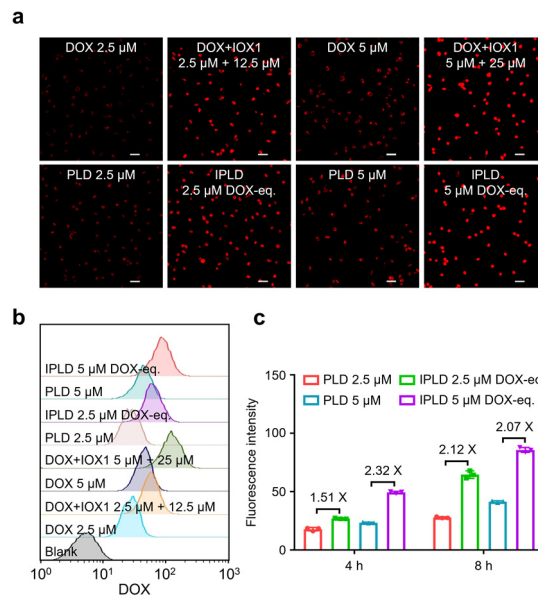

**Supplementary Fig. 9. Intracellular DOX analysis after different treatments in CT26 cells.** **a**, CLSM images and **b**, flow cytometry analysis of CT26 cells treated with DOX or its combination with IOX1 or their liposomes; 8 h culture, scale bars, 50 μm; red: DOX; The experiments were repeated independently three times to confirm the results. **c**, The intracellular DOX fluorescence intensity measured by flow cytometry of CT26 cells after different treatments for 4 h or 8 h;  $n = 3$  independent experiments. Data represent mean  $\pm$  SD. See Figs. 2d,e in the text for images and other conditions. Source data are provided as a Source Data file.

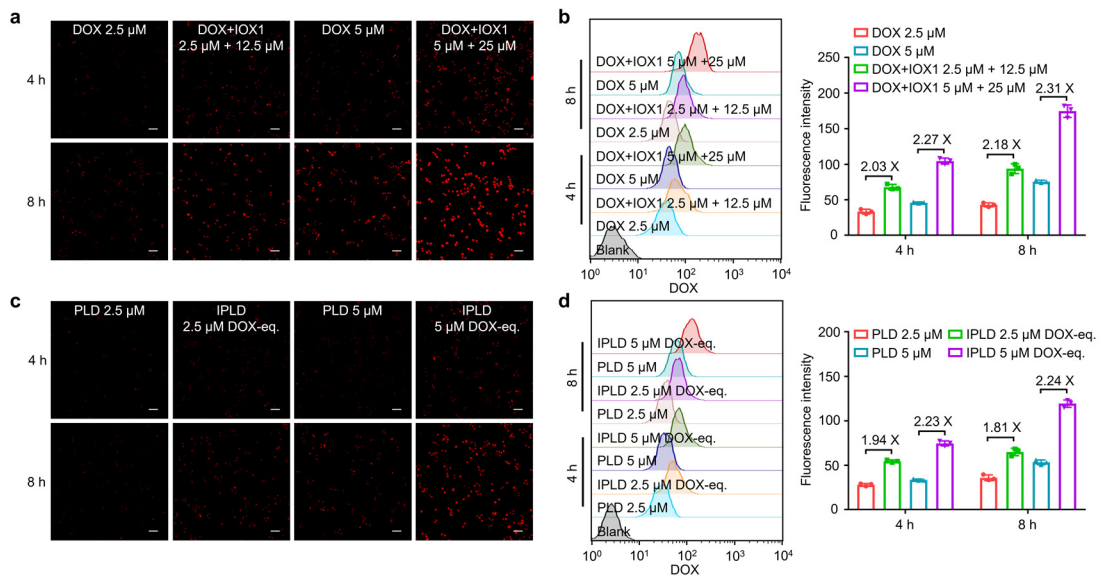

**Supplementary Fig. 10. Intracellular DOX analysis after different treatments in HCT116 cells.** **a,c**, CLSM images and **b,d**, flow cytometry analysis of HCT116 cells treated with DOX, DOX+IOX1, PLD or IPLD; 4 h or 8 h culture, scale bars, 50  $\mu\text{m}$ ; red: DOX.  $n = 3$  independent experiments. Data represent mean  $\pm$  SD. Source data are provided as a Source Data file.

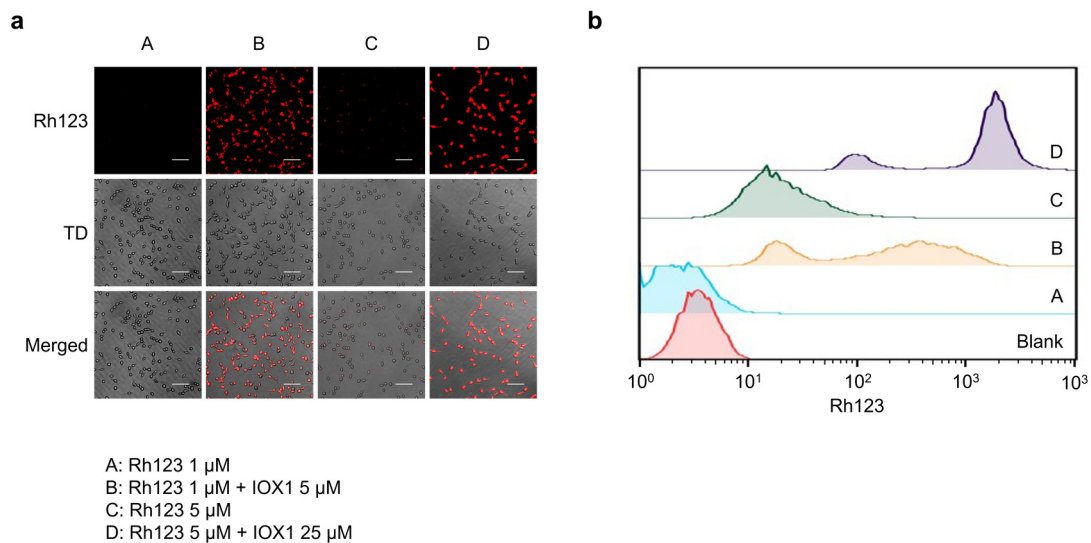

**Supplementary Fig. 11. P-gp activity evaluation using rhodamine 123 (Rh123).** **a**, CLSM images and **b**, flow cytometry analysis of intracellular Rh123 after different treatments in CT26 cells; 4 h culture, scale bars: 100  $\mu\text{m}$ ; red: Rh123. The experiments were repeated independently three times to confirm the results.



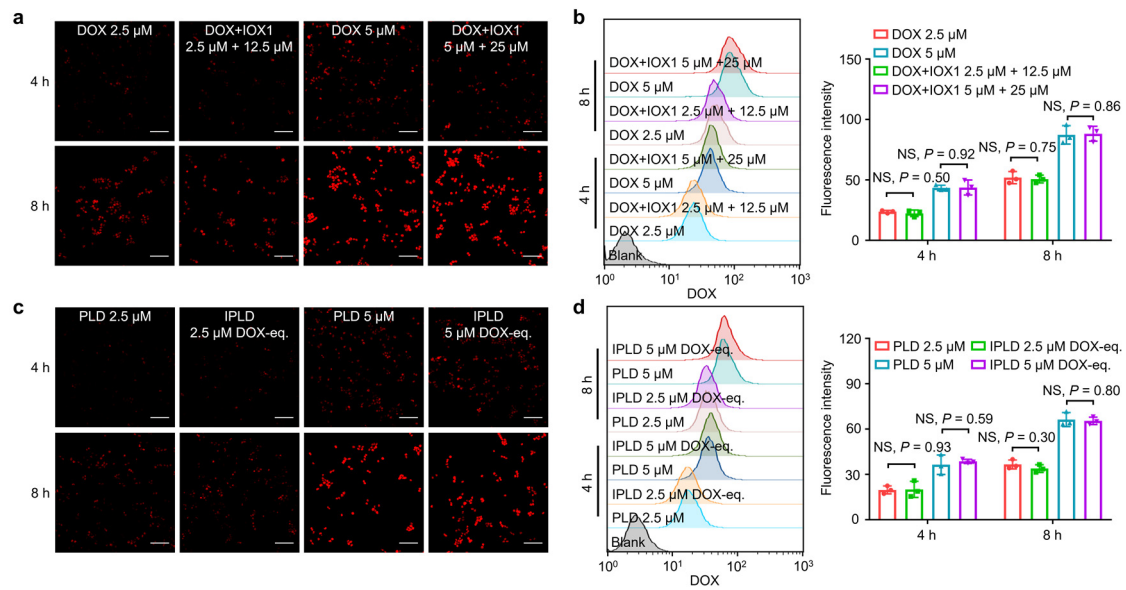

**Supplementary Fig. 12. Intracellular DOX analysis after different treatments in NIH-3T3 cells.** **a,c**, CLSM images and **b,d**, flow cytometry analysis of NIH-3T3 cells treated with DOX, DOX+IOX1, PLD or IPLD; 4 h or 8 h culture, scale bars, 100  $\mu\text{m}$ ; red: DOX.  $n = 3$  independent experiments. Data represent mean  $\pm$  SD. Two-tailed Student's  $t$ -test. NS, no significance. Source data are provided as a Source Data file.

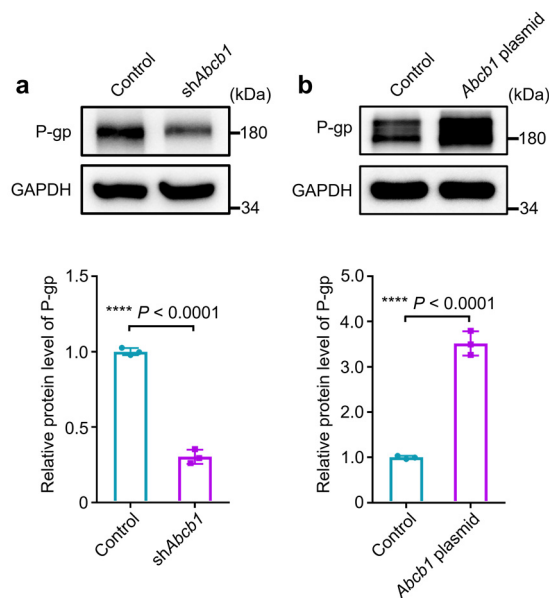

**Supplementary Fig. 13. Construction of P-gp-knockdown or -overexpressing CT26 cells.** Western blotting images and their quantification of P-gp expression in CT26 cells transfecting with **a**, *Abcb1* shRNA (sh*Abcb1*, 2  $\mu\text{g}/\text{well}$ ) or **b**, *Abcb1* plasmid (2  $\mu\text{g}/\text{well}$ ) for 48 h.  $n = 3$  independent experiments. Data represent mean  $\pm$  SD. Two-tailed Student's  $t$ -test. \*\*\*\*  $P < 0.0001$ . Source data are provided as a Source Data file.

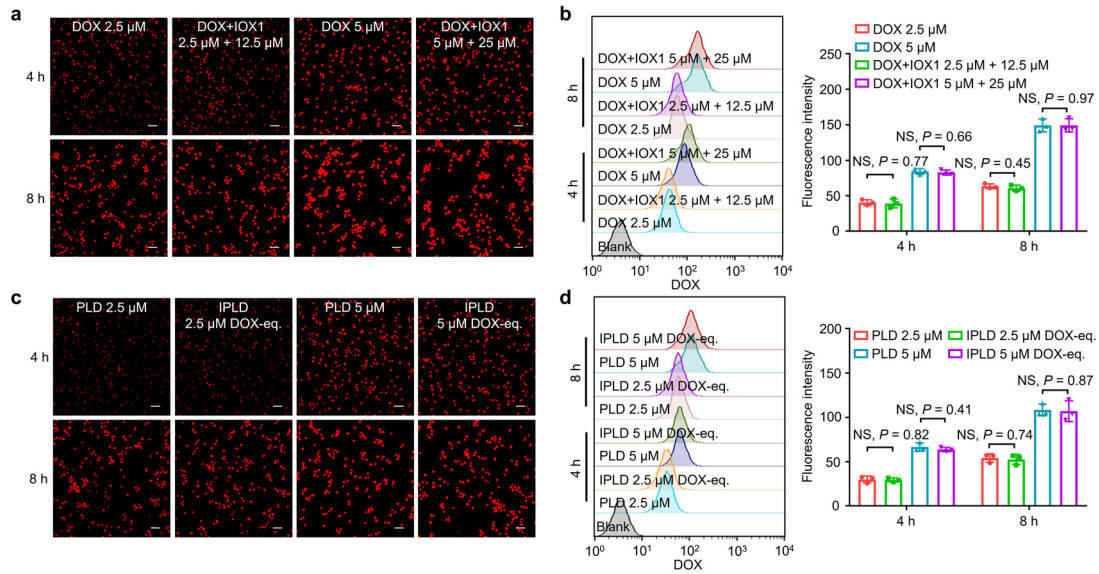

**Supplementary Fig. 14. Intracellular DOX analysis after different treatments in P-gp-knockdown CT26 cells.** a,c, CLSM images and b,d, flow cytometry analysis of P-gp-knockdown CT26 cells treated with DOX, DOX+IOX1, PLD or IPLD; 4 h or 8 h culture, scale bars, 50  $\mu$ m; red: DOX.  $n = 3$  independent experiments. Data represent mean  $\pm$  SD. Two-tailed Student's  $t$ -test. NS, no significance. Source data are provided as a Source Data file.

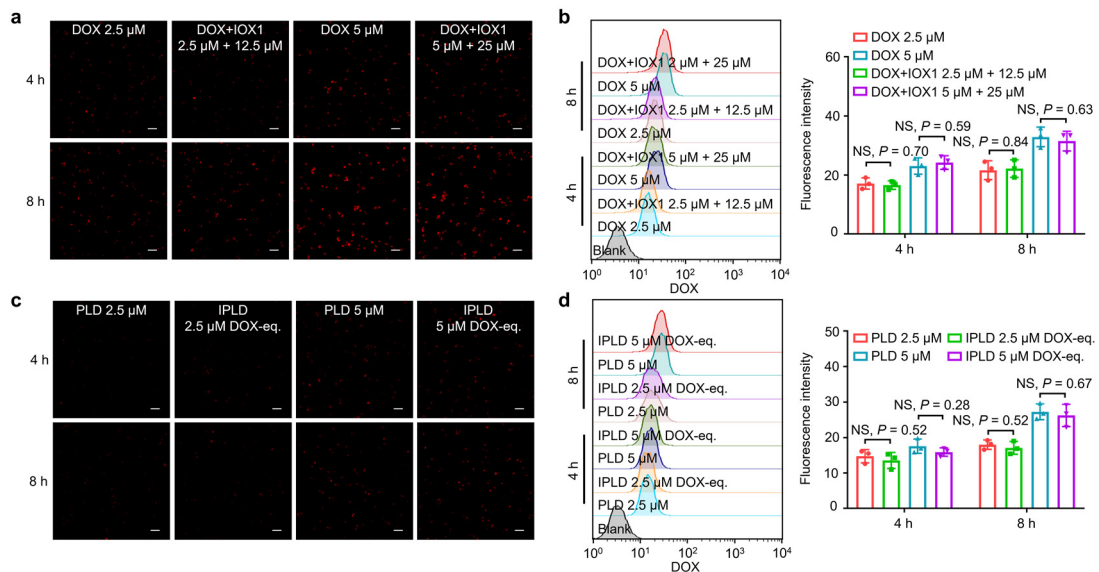

**Supplementary Fig. 15. Intracellular DOX analysis after different treatments in P-gp-overexpressing CT26 cells.** a,c, CLSM images and b,d, flow cytometry analysis of P-gp-overexpressing CT26 cells treated with DOX, DOX+IOX1, PLD or IPLD; 4 h or 8 h culture, scale bars, 50  $\mu$ m; red: DOX.  $n = 3$  independent experiments. Data represent mean  $\pm$  SD. Two-tailed Student's  $t$ -test. NS, no significance. Source data are provided as a Source Data file.

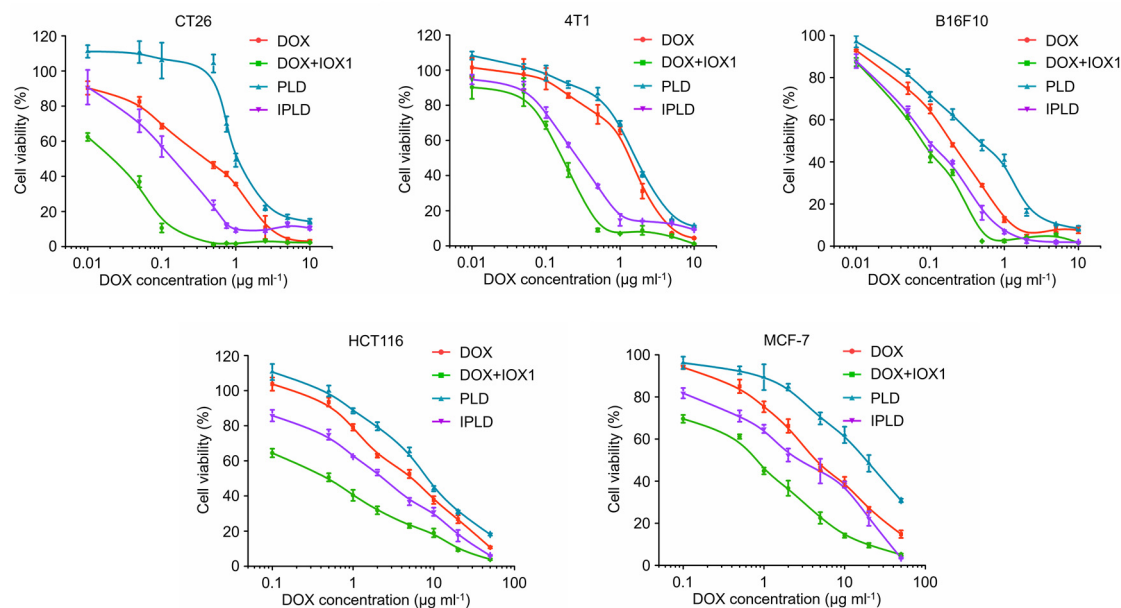

**Supplementary Fig. 16. The MTT assay curves of DOX, DOX+IOX1, PLD, or IPLD against cancer cells.** 48 h incubation; the molar concentration of IOX1 was kept at 5 times of that of DOX.  $n = 3$  independent experiments. Data represent mean  $\pm$  SD. Source data are provided as a Source Data file.

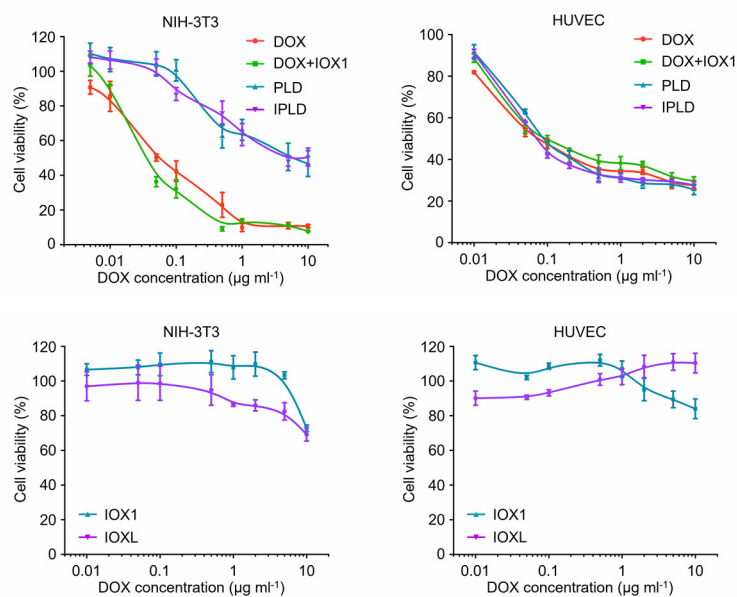

**Supplementary Fig. 17. The MTT assay curves of DOX, DOX+IOX1, PLD, IPLD, or IOX1 alone or its liposomes against NIH-3T3 or HUVEC cells.** 48 h incubation; the molar concentration of IOX1 was kept at 5 times of that of DOX.  $n = 3$  independent experiments. Data represent mean  $\pm$  SD. Source data are provided as a Source Data file.

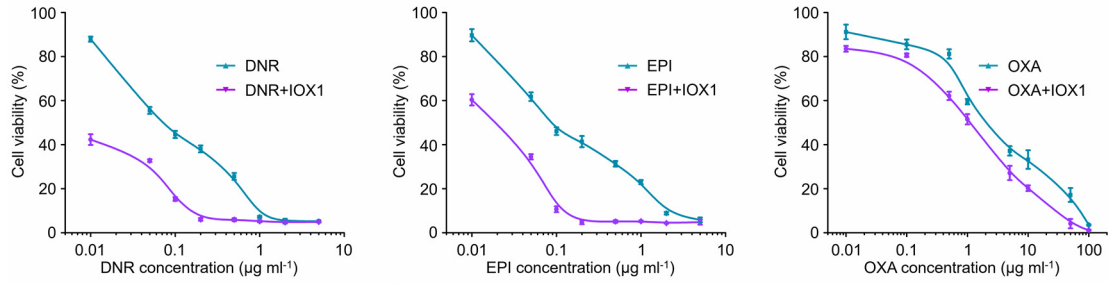

**Supplementary Fig. 18.** The MTT assay curves of DNR, EPI, OXA or its combination with IOX1 against CT26 cells. 48 h incubation; the molar concentration of IOX1 was kept at 5 times of that of chemotherapeutic drugs.  $n = 3$  independent experiments. Data represent mean  $\pm$  SD. Source data are provided as a Source Data file.

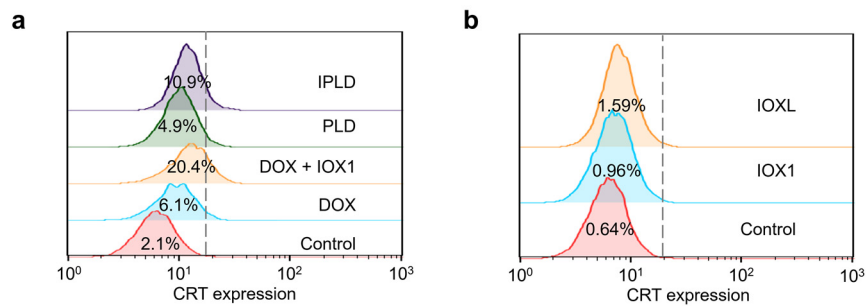

**Supplementary Fig. 19.** Flow cytometry analysis of CRT exposure on CT26 cells. Cells were treated for 4 h with **a**, DOX (5  $\mu$ M), DOX+IOX1 (DOX, 5  $\mu$ M; IOX1, 25  $\mu$ M), PLD (DOX, 5  $\mu$ M), IPLD (DOX, 5  $\mu$ M; IOX1, 25  $\mu$ M) **b**, IOX1 (25  $\mu$ M) or IOXL (IOX1, 25  $\mu$ M). The experiments were repeated independently three times to confirm the results.

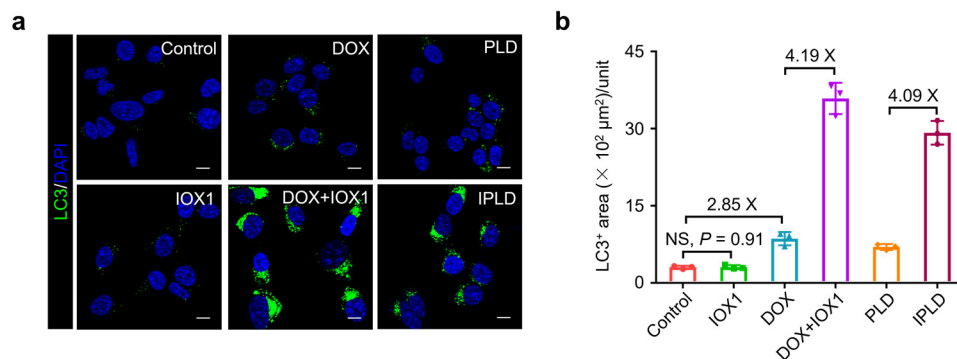

**Supplementary Fig. 20.** Autophagosome analysis after treatments. **a**, CLSM images **b**, and the quantification of the autophagosomes stained with anti-LC3 antibody (green); Cells were treated for 4 h with IOX1 (25  $\mu$ M), DOX (5  $\mu$ M), DOX+IOX1 (DOX, 5  $\mu$ M; IOX1, 25  $\mu$ M), PLD (DOX, 5  $\mu$ M) or IPLD (DOX, 5  $\mu$ M; IOX1, 25  $\mu$ M); blue: DAPI; scale bars, 10  $\mu$ m.  $n = 3$  independent experiments. Data represent mean  $\pm$  SD. Two-tailed Student's  $t$ -test. NS, no significance. Source data are provided as a Source Data file.

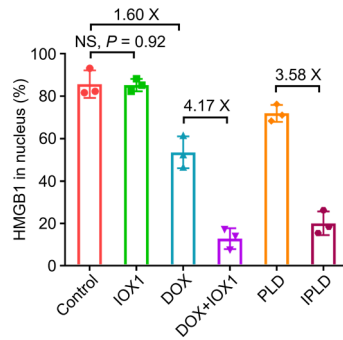

**Supplementary Fig. 21. Quantification of HMGB1 release in CT26 cells calculated from CLSM images.**  $n = 3$  independent experiments. Data represent mean  $\pm$  SD. Two-tailed Student's  $t$ -test. NS, no significance. See Fig. 2g in the text for images and conditions. Source data are provided as a Source Data file.

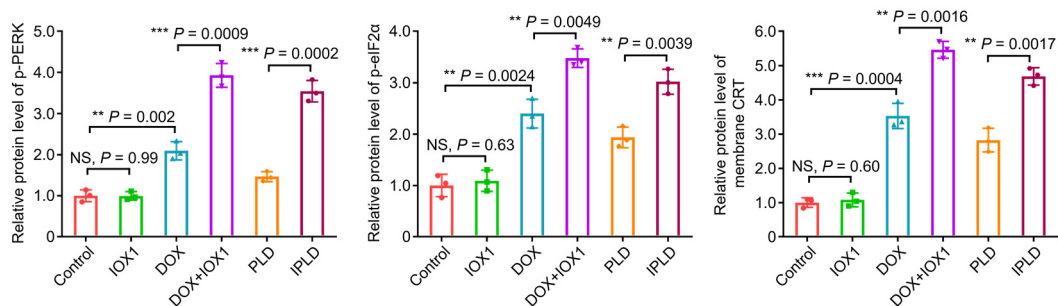

**Supplementary Fig. 22. The quantification by western blotting of p-PERK, p-eIF2 $\alpha$  and membrane CRT expression in CT26 cells.** Cells were treated for 4 h with IOX1 (25  $\mu$ M), DOX (5  $\mu$ M), DOX+IOX1 (DOX, 5  $\mu$ M; IOX1, 25  $\mu$ M), PLD (DOX, 5  $\mu$ M) or IPLD (DOX, 5  $\mu$ M; IOX1, 25  $\mu$ M).  $n = 3$  independent experiments. Data represent mean  $\pm$  SD. Two-tailed Student's  $t$ -test. NS, no significance; \*\*  $P < 0.01$ , \*\*\*  $P < 0.001$ . See Fig. 2j in the text for images and other conditions. Source data are provided as a Source Data file.

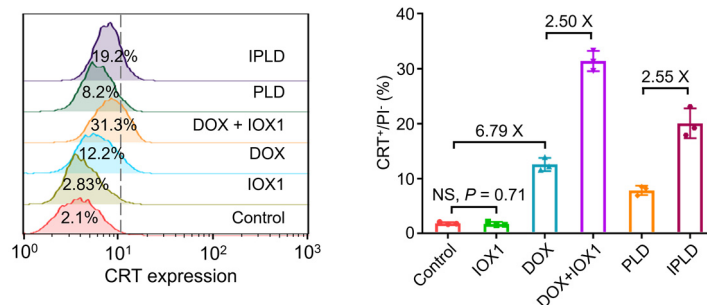

**Supplementary Fig. 23. Flow cytometry analysis and the quantification of CRT exposure in HCT116 cells after treatments.** Cells were treated for 4 h with IOX1 (25  $\mu$ M), DOX (5  $\mu$ M), DOX+IOX1 (DOX, 5  $\mu$ M; IOX1, 25  $\mu$ M), PLD (DOX, 5  $\mu$ M) or IPLD (DOX, 5  $\mu$ M; IOX1, 25  $\mu$ M).  $n = 3$  independent experiments. Data represent mean  $\pm$  SD. Two-tailed Student's  $t$ -test. NS, no significance. Source data are provided as a Source Data file.

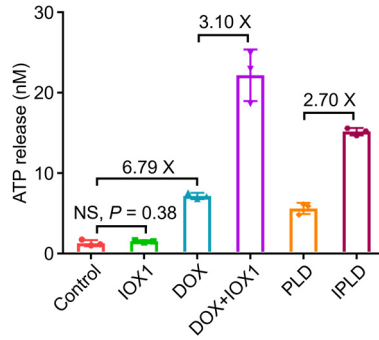

**Supplementary Fig. 24. ATP secretion of HCT116 cells after treatments.** Cells were treated for 4 h with IOX1 (25  $\mu$ M), DOX (5  $\mu$ M), DOX+IOX1 (DOX, 5  $\mu$ M; IOX1, 25  $\mu$ M) or PLD (DOX, 5  $\mu$ M), IPLD (DOX, 5  $\mu$ M; IOX1, 25  $\mu$ M).  $n = 3$  independent experiments. Data represent mean  $\pm$  SD. Two-tailed Student's  $t$ -test. NS, no significance. Source data are provided as a Source Data file.

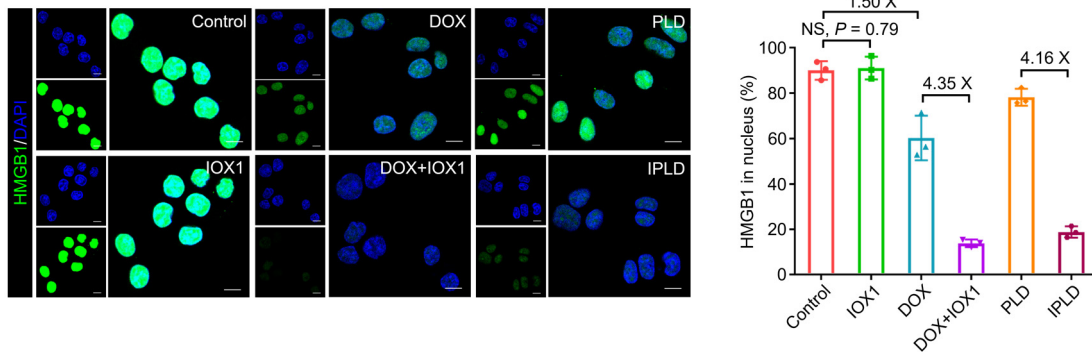

**Supplementary Fig. 25. CLSM images and quantification of the nuclear HMGB1 after treatments.** HCT116 cells were treated for 4 h with IOX1 (25  $\mu$ M), DOX (5  $\mu$ M), DOX+IOX1 (DOX, 5  $\mu$ M; IOX1, 25  $\mu$ M), PLD (DOX, 5  $\mu$ M), IPLD (DOX, 5  $\mu$ M; IOX1, 25  $\mu$ M); green: HMGB1; blue: DAPI; scale bars, 10  $\mu$ m.  $n = 3$  independent experiments. Data represent mean  $\pm$  SD. Two-tailed Student's  $t$ -test. NS, no significance. Source data are provided as a Source Data file.

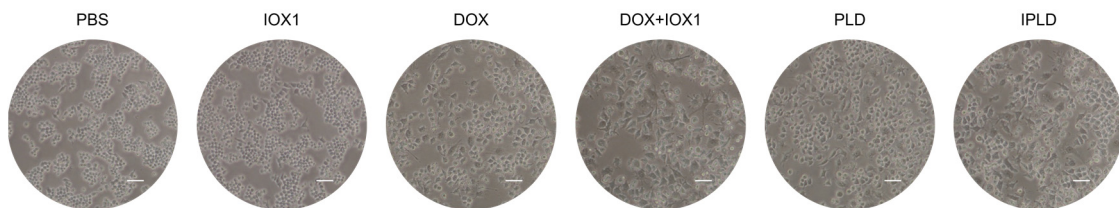

**Supplementary Fig. 26. Microscopy images of BMDCs after treatments.** scale bars, 50  $\mu$ m. See Figs. 3a-c in the text for conditions. The experiment was repeated independently three times to confirm the results.

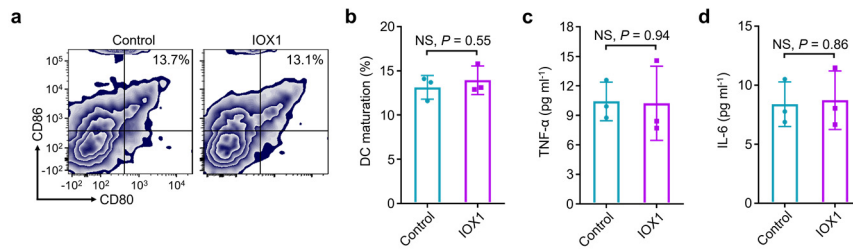

**Supplementary Fig. 27. IOX1 direct effects on DC maturation and cytokine secretion.** DC maturation determined by **a**, flow cytometry and **b**, quantification of the mature DCs ( $CD11c^+CD80^+CD86^+$ ), and their secretion of **c**, TNF- $\alpha$  and **d**, IL-6 in supernatants after treating for 24 h with IOX1 (25  $\mu$ M) without CT26 cells.  $n = 3$  independent experiments. Data represent mean  $\pm$  SD. Two-tailed Student's  $t$ -test. NS, no significance. Source data are provided as a Source Data file.

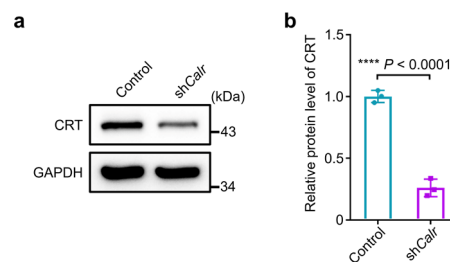

**Supplementary Fig. 28. Construction of CRT-knockdown CT26 cells.** **a**, Western blotting images and **b**, their quantification of CRT expression in CT26 cells after transfecting for 48 h with CRT shRNA (shCalr, 2  $\mu$ g/well).  $n = 3$  independent experiments. Data represent mean  $\pm$  SD. Two-tailed Student's  $t$ -test. \*\*\*\*  $P < 0.0001$ . Source data are provided as a Source Data file.

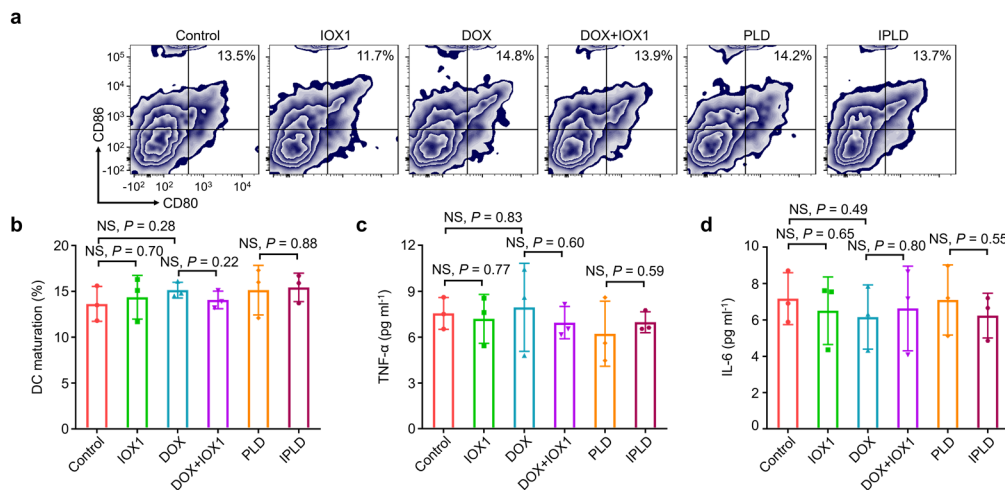

**Supplementary Fig. 29. DC maturation in CRT-knockdown CT26 cells after treatments.** DC maturation determined by **a**, flow cytometry and **b**, quantification of the mature DCs ( $CD11c^+CD80^+CD86^+$ ), and their secretion of **c**, TNF- $\alpha$  and **d**, IL-6 in supernatants after co-culturing with CRT-knockdown CT26 cells pre-treated with IOX1 (25  $\mu$ M), DOX (5  $\mu$ M), DOX+IOX1 (DOX, 5  $\mu$ M; IOX1, 25  $\mu$ M), PLD (DOX, 5  $\mu$ M) or IPLD (DOX, 5  $\mu$ M; IOX1, 25  $\mu$ M).  $n = 3$  independent experiments. Data represent mean  $\pm$  SD. Two-tailed Student's  $t$ -test. NS, no significance. Source data are provided as a Source Data file.

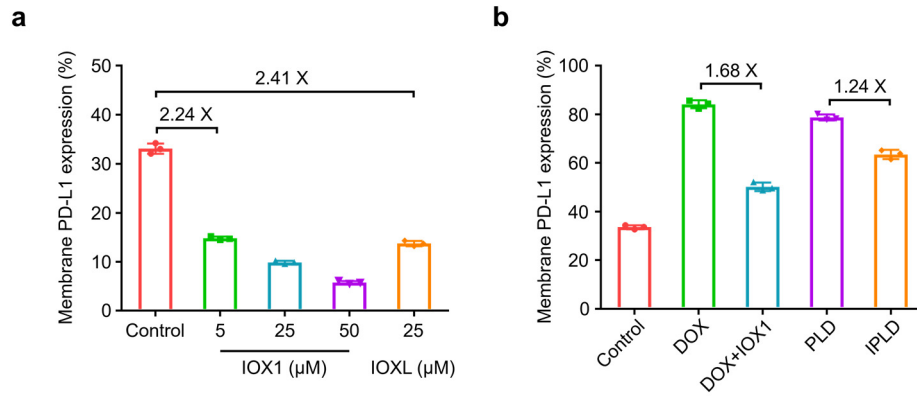

**Supplementary Fig. 30. Membrane PD-L1 in CT26 cells after treatments analyzed by flow cytometry.** Cells were treated for 24 h with **a**, IOX1 (5, 25, or 50  $\mu\text{M}$ ), IOXL (IOX1, 25  $\mu\text{M}$ ), **b**, DOX (5  $\mu\text{M}$ ), DOX+IOX1 (DOX, 5  $\mu\text{M}$ ; IOX1, 25  $\mu\text{M}$ ), PLD (DOX, 5  $\mu\text{M}$ ) or IPLD (DOX, 5  $\mu\text{M}$ ; IOX1, 25  $\mu\text{M}$ ).  $n = 3$  independent experiments. Data represent mean  $\pm$  SD. Two-tailed Student's  $t$ -test. See Fig. 3d in the text for histograms and other conditions. Source data are provided as a Source Data file.

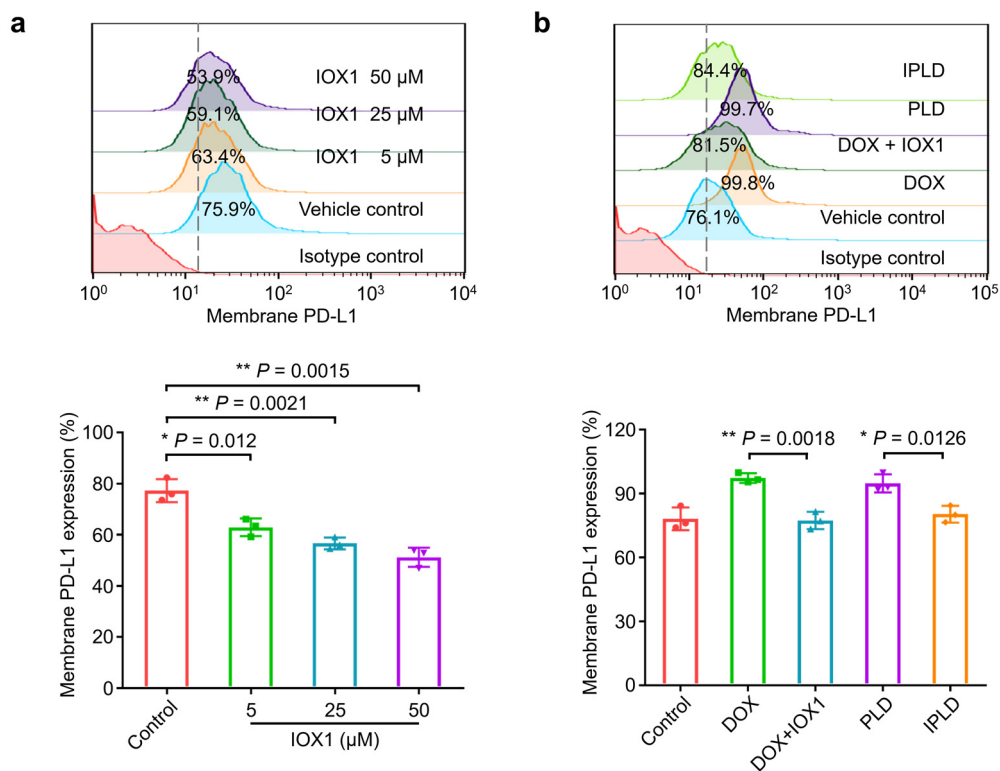

**Supplementary Fig. 31. Membrane PD-L1 in HCT116 cells after treatments analyzed by flow cytometry.** HCT116 cells were treated with **a**, IOX1 (5, 25, or 50  $\mu\text{M}$ ), **b**, DOX (5  $\mu\text{M}$ ), DOX+IOX1 (DOX, 5  $\mu\text{M}$ ; IOX1, 25  $\mu\text{M}$ ), PLD (DOX, 5  $\mu\text{M}$ ) or IPLD (DOX, 5  $\mu\text{M}$ ; IOX1, 25  $\mu\text{M}$ ) for 24 h.  $n = 3$  independent experiments. Data represent mean  $\pm$  SD. Two-tailed Student's  $t$ -test. \*  $P < 0.05$ , \*\*  $P < 0.01$ . Source data are provided as a Source Data file.



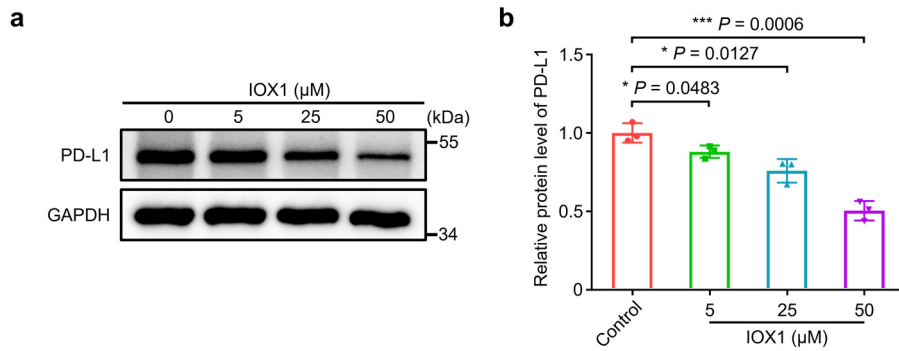

**Supplementary Fig. 32. PD-L1 expression in HCT116 cells after treating with IOX1.** **a**, Western blotting images and **b**, their quantification; HCT116 cells were treated with IOX1 (5, 25, or 50  $\mu\text{M}$ ) for 24 h.  $n = 3$  independent experiments. Data represent mean  $\pm$  SD. Two-tailed Student's  $t$ -test. \*  $P < 0.05$ , \*\*\*  $P < 0.001$ . Source data are provided as a Source Data file.

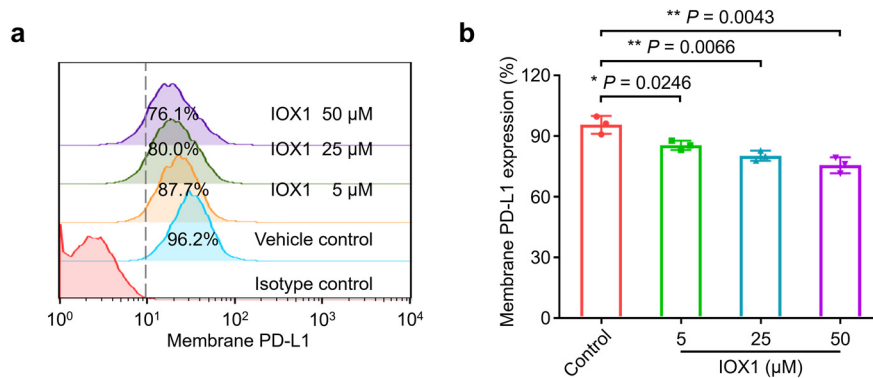

**Supplementary Fig. 33. Membrane PD-L1 in MCF-7 cells after treatments analyzed by flow cytometry.** **a**, Flow cytometry analysis and **b**, quantification; MCF-7 cells were treated with IOX1 (5, 25, or 50  $\mu\text{M}$ ) for 24 h.  $n = 3$  independent experiments. Data represent mean  $\pm$  SD. Two-tailed Student's  $t$ -test. \*  $P < 0.05$ , \*\*  $P < 0.01$ . Source data are provided as a Source Data file.

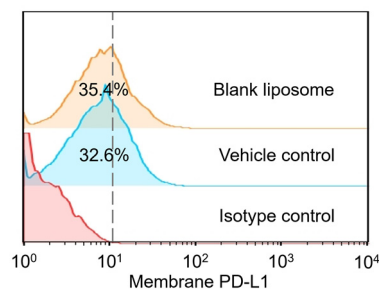

**Supplementary Fig. 34. The effect of blank liposome on PD-L1 expression in CT26 cells analyzed by flow cytometry.** Cells were treated with blank liposomes equivalent to the lipid concentration of 25  $\mu\text{M}$  IOXL for 24 h. The experiment was repeated independently three times to confirm the results.

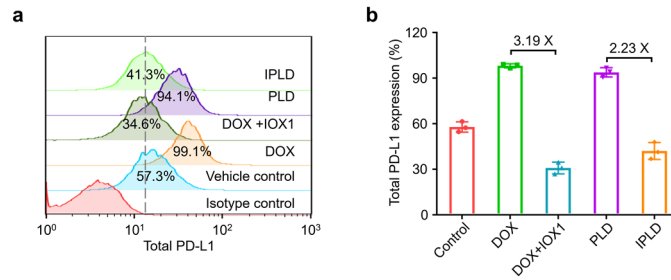

**Supplementary Fig. 35. The total PD-L1 expression of CT26 cells after treatments.** **a**, Flow cytometry analysis and **b**, quantification; Cells were treated with DOX (5  $\mu$ M), DOX+IOX1 (DOX, 5  $\mu$ M; IOX1, 25  $\mu$ M), PLD (DOX, 5  $\mu$ M) or IPLD (DOX, 5  $\mu$ M; IOX1, 25  $\mu$ M) for 24 h.  $n = 3$  independent experiments. Data represent mean  $\pm$  SD. Source data are provided as a Source Data file.

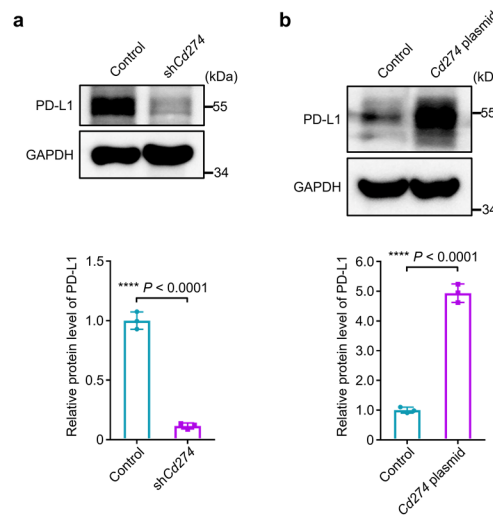

**Supplementary Fig. 36. Construction of PD-L1-knockdown or -overexpressing CT26 cells.** Western blotting images and their quantification of PD-L1 expression in CT26 cells transfecting with **a**, PD-L1 shRNA (shCd274, 2  $\mu$ g/well) or **b**, Cd274 plasmid (2  $\mu$ g/well) for 48 h.  $n = 3$  independent experiments. Data represent mean  $\pm$  SD. Two-tailed Student's  $t$ -test. \*\*\*\*  $P < 0.0001$ . Source data are provided as a Source Data file.

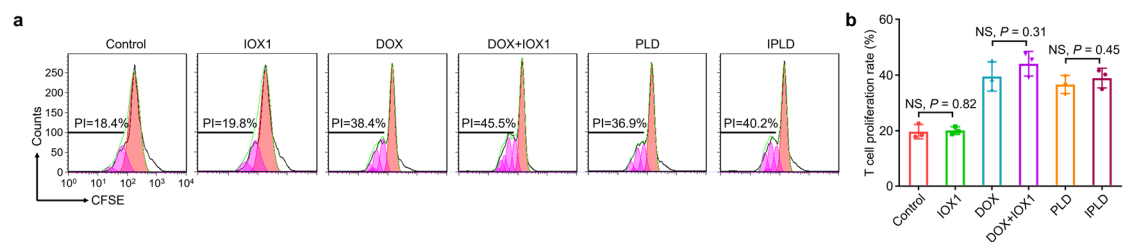

**Supplementary Fig. 37. The effects on T cell proliferation of pre-treated PD-L1-knockdown CT26 cells.** **a**, Flow cytometric profiles and **b**, their calculated proliferation indices (PIs) of T cells after co-culturing with PD-L1-knockdown CT26 cells pre-treated with IOX1, DOX, their combination, PLD, or IPLD; IOX1 dose, 25  $\mu$ M; DOX dose, 5  $\mu$ M; 24 h;  $n = 3$  independent experiments. Data represent mean  $\pm$  SD. Two-tailed Student's  $t$ -test. NS, no significance. Source data are provided as a Source Data file.

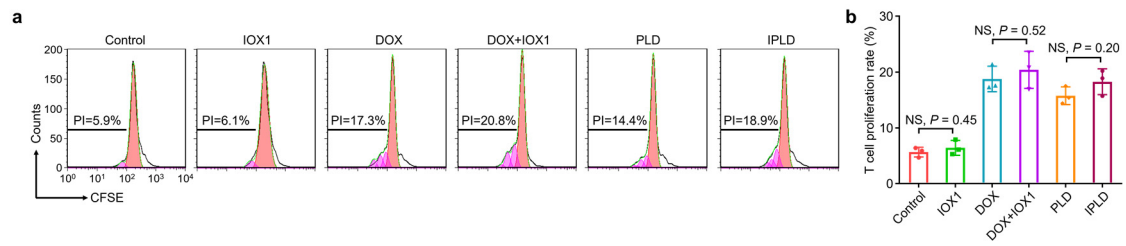

**Supplementary Fig. 38. The effects on T cell proliferation of pre-treated PD-L1-overexpressing CT26 cells. a**, Flow cytometric profiles and **b**, their calculated proliferation indices (PIs) of T cells after co-culturing with PD-L1-overexpressing CT26 cells pre-treated with IOX1, DOX, their combination, PLD, or IPLD; IOX1 dose, 25  $\mu$ M; DOX dose, 5  $\mu$ M; 24 h;  $n = 3$  independent experiments. Data represent mean  $\pm$  SD. Two-tailed Student's  $t$ -test. NS, no significance. Source data are provided as a Source Data file.

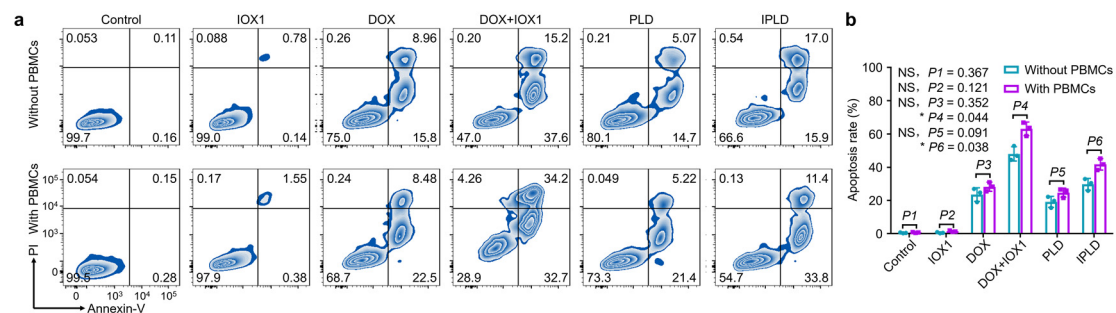

**Supplementary Fig. 39. The effects on T cell activity of pre-treated PD-L1-overexpressing CT26 cells. a**, Flow cytometric analysis and **b**, quantification of the apoptotic PD-L1-overexpressing CT26 cells pre-treated with IOX1, DOX, their combination, PLD, or IPLD for 24 h with or without PBMCs co-culturing; IOX1 dose, 25  $\mu$ M; DOX dose, 5  $\mu$ M;  $n = 3$  independent experiments. Data represent mean  $\pm$  SD. Two-tailed Student's  $t$ -test. NS, no significance; \*  $P < 0.05$ . Source data are provided as a Source Data file.

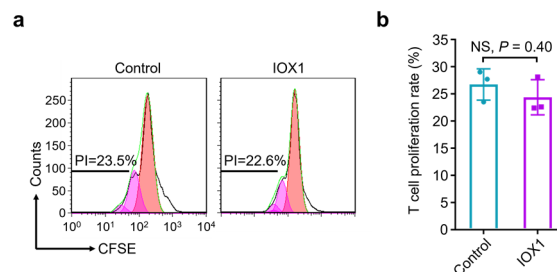

**Supplementary Fig. 40. IOX1 direct effect on T cell proliferation. a**, Flow cytometric profiles and **b**, their calculated proliferation indices (PIs) of T cells after treating with IOX1 (25  $\mu$ M) for 72 h without CT26 cells.  $n = 3$  independent experiments. Data represent mean  $\pm$  SD. Two-tailed Student's  $t$ -test. NS, no significance. Source data are provided as a Source Data file.

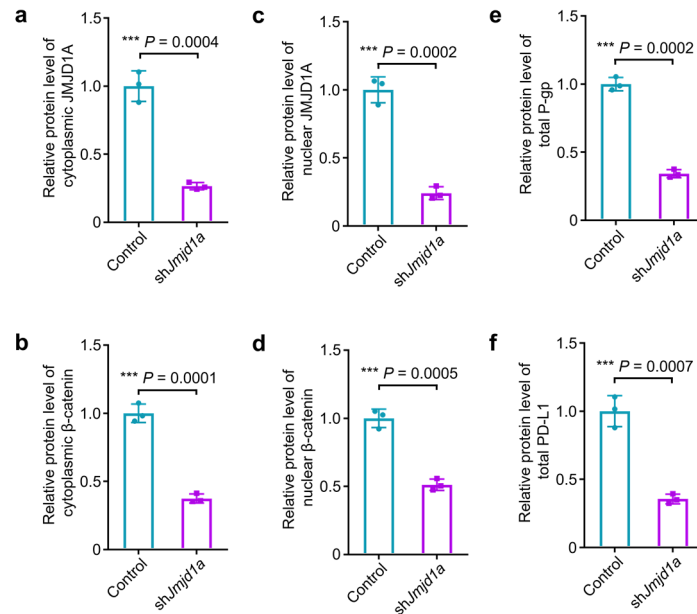

**Supplementary Fig. 41. JMJD1A downstream protein expression in JMJD1A-knockdown CT26 cells.** Quantification by western blotting of **a**, cytoplasmic JMJD1A, **b**, cytoplasmic  $\beta$ -catenin, **c**, nuclear JMJD1A, **d**, nuclear  $\beta$ -catenin, **e**, total P-gp and **f**, total PD-L1 in CT26 cells at 48 h after transfecting with sh*Jmjd1a* (2  $\mu$ g/well).  $n = 3$  independent experiments. Data represent mean  $\pm$  SD. Two-tailed Student's *t*-test. \*\*\*  $P < 0.001$ . See Fig. 4b in the text for images and other conditions. Source data are provided as a Source Data file.

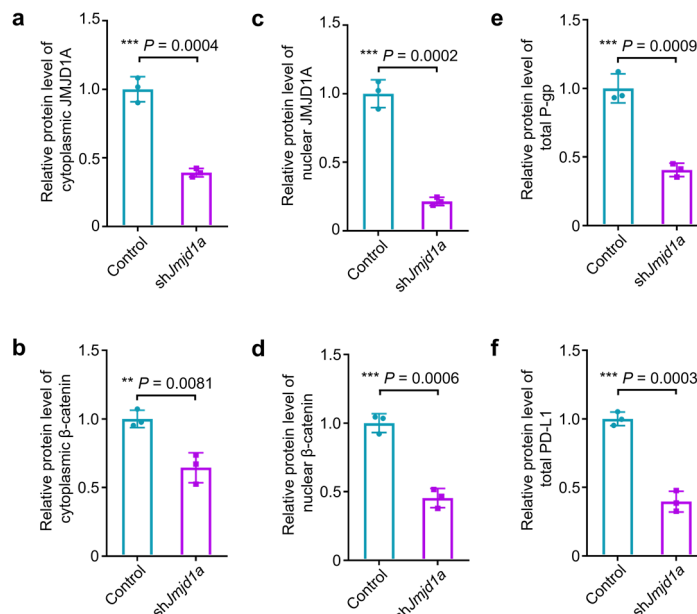

**Supplementary Fig. 42. JMJD1A downstream protein expression in JMJD1A-knockdown HCT116 cells.** Quantification by western blotting of **a**, cytoplasmic JMJD1A, **b**, cytoplasmic  $\beta$ -catenin, **c**, nuclear JMJD1A, **d**, nuclear  $\beta$ -catenin, **e**, total P-gp and **f**, total PD-L1 in HCT116 cells after transfecting for 48 h with sh*Jmjd1a* (2  $\mu$ g/well).  $n = 3$  independent experiments. Data represent mean  $\pm$  SD. Two-tailed Student's *t*-test. \*\*  $P < 0.01$ , \*\*\*  $P < 0.001$ . See Fig. 4c in the text for images and other conditions. Source data are provided as a Source Data file.

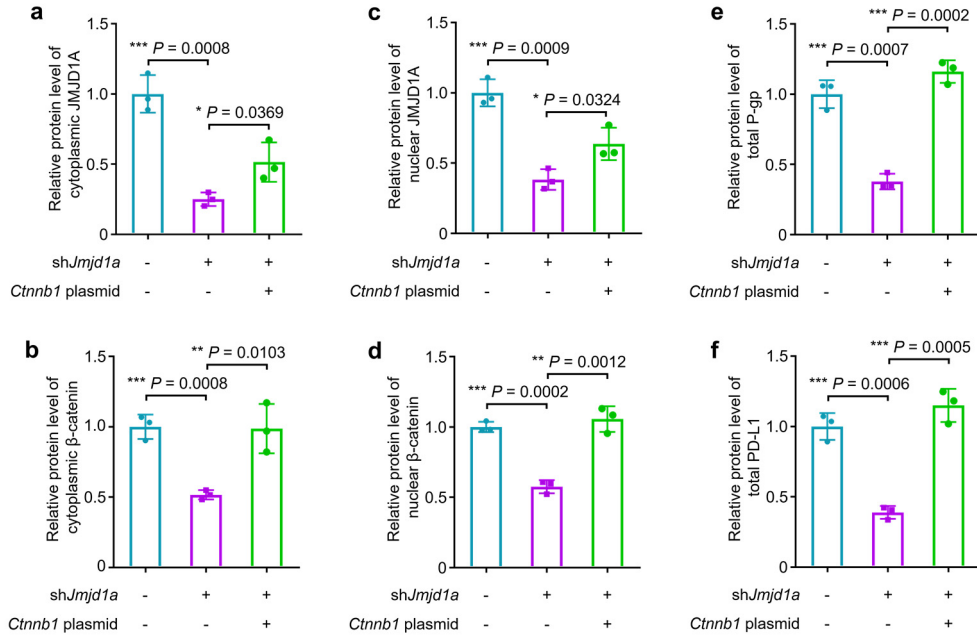

**Supplementary Fig. 43. Effects of  $\beta$ -catenin-rescue on the JMJD1A downstream protein expression in JMJD1A-knockdown CT26 cells.** Quantification by western blotting of **a**, cytoplasmic JMJD1A, **b**, cytoplasmic  $\beta$ -catenin, **c**, nuclear JMJD1A, **d**, nuclear  $\beta$ -catenin, **e**, total P-gp and **f**, total PD-L1. CT26 cells were transfected with *shJmjd1a* (2  $\mu$ g/well) for 48 h and then with *Ctnnb1* plasmid (2  $\mu$ g/well) for 24 h.  $n = 3$  independent experiments. Data represent mean  $\pm$  SD. Two-tailed Student's *t*-test. \*  $P < 0.05$ , \*\*  $P < 0.01$ , \*\*\*  $P < 0.001$ . See Fig. 4f in the text for images and other conditions. Source data are provided as a Source Data file.

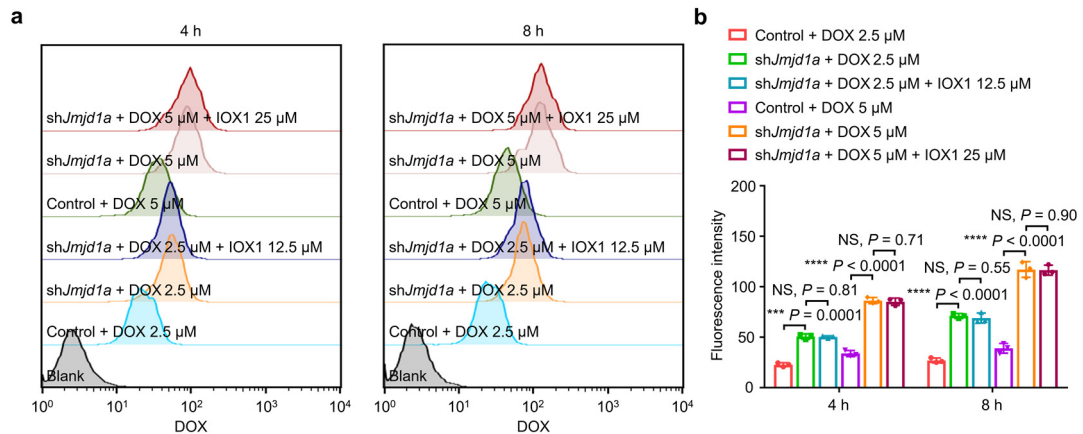

**Supplementary Fig. 44. Flow cytometry analysis of intracellular DOX accumulation in control or JMJD1A-knockdown CT26 cells.** **a**, Flow cytometry analysis and **b**, quantification; 4 h or 8 h treatment with DOX; the *shJmjd1a* +DOX groups are the cells first transfected with *shJmjd1a* for 48 h and then cultured with DOX or DOX+IOX1 at the indicated doses for 4 or 8 h.  $n = 3$  independent experiments. Data represent mean  $\pm$  SD. Two-tailed Student's *t*-test. NS, no significance; \*\*\*  $P < 0.001$ , \*\*\*\*  $P < 0.0001$ . Source data are provided as a Source Data file.

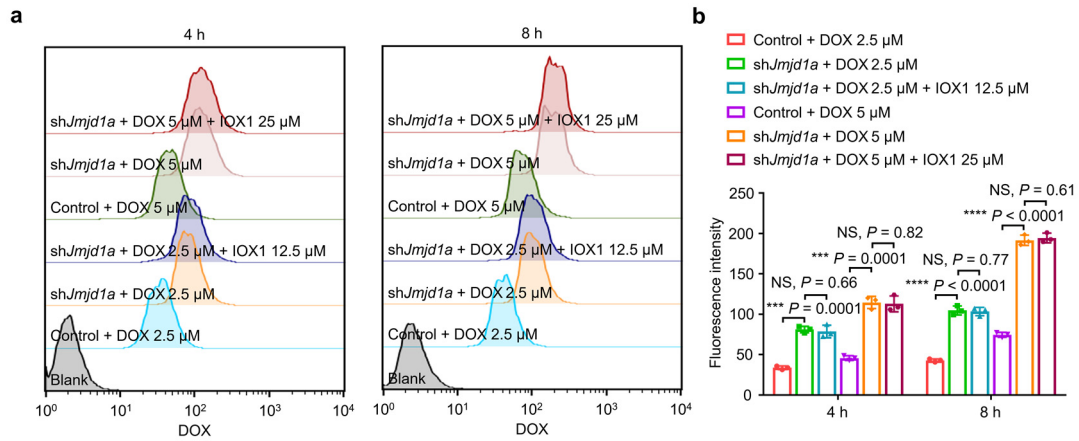

**Supplementary Fig. 45. Flow cytometry analysis of intracellular DOX accumulation in control or JMJD1A-knockdown HCT116 cells. a**, Flow cytometry analysis and **b**, quantification; 4 h or 8 h treatment with DOX; the shJmjd1a +DOX groups are the cells first transfected with shJmjd1a for 48 h and then cultured with DOX or DOX+IOX1 at the indicated doses for 4 or 8 h.  $n = 3$  independent experiments. Data represent mean  $\pm$  SD. Two-tailed Student's *t*-test. NS, no significance; \*\*\*  $P < 0.001$ , \*\*\*\*  $P < 0.0001$ . Source data are provided as a Source Data file.

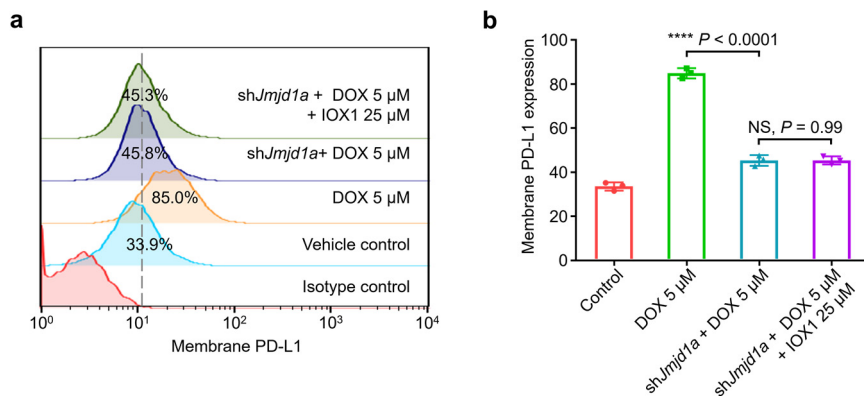

**Supplementary Fig. 46. Membrane PD-L1 in control or JMJD1A-knockdown CT26 cells after treatments analyzed by flow cytometry. a**, Flow cytometry analysis and **b**, quantification; Control or JMJD1A-knockdown CT26 cells were treated with DOX (5  $\mu$ M) or DOX+IOX1 (DOX, 5  $\mu$ M; IOX1, 25  $\mu$ M) for 24 h.  $n = 3$  independent experiments. Data represent mean  $\pm$  SD. Two-tailed Student's *t*-test. NS, no significance; \*\*\*\*  $P < 0.0001$ . Source data are provided as a Source Data file.

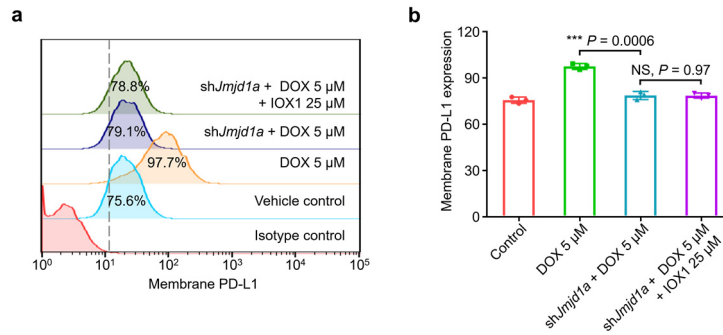

**Supplementary Fig. 47. Membrane PD-L1 in control or JMJD1A-knockdown HCT116 cells after treatments analyzed by flow cytometry.** **a**, Flow cytometry analysis and **b**, quantification; Control or JMJD1A-knockdown HCT116 cells were treated with DOX (5  $\mu$ M) or DOX+IOX1 (DOX, 5  $\mu$ M; IOX1, 25  $\mu$ M) for 24 h.  $n = 3$  independent experiments. Data represent mean  $\pm$  SD. Two-tailed Student's  $t$ -test. NS, no significance; \*\*\*  $P < 0.001$ . Source data are provided as a Source Data file.

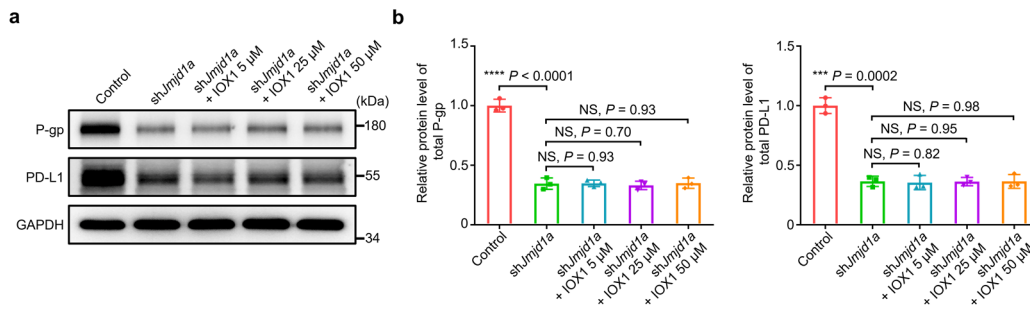

**Supplementary Fig. 48. IOX1 effect on the P-gp and PD-L1 expression in JMJD1A-knockdown CT26 cells.** **a**, Western blotting images and **b**, their quantification; JMJD1A-knockdown CT26 cells were treated with IOX1 (5, 25, or 50  $\mu$ M) for 24 h.  $n = 3$  independent experiments. Data represent mean  $\pm$  SD. Two-tailed Student's  $t$ -test. NS, no significance; \*\*\*  $P < 0.001$ , \*\*\*\*  $P < 0.0001$ . Source data are provided as a Source Data file.

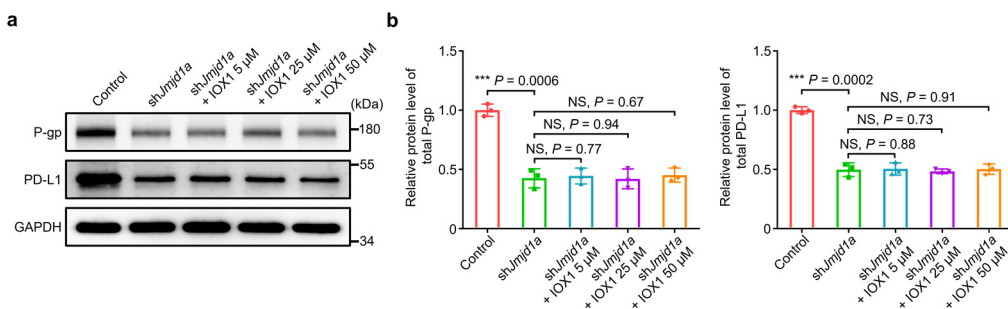

**Supplementary Fig. 49. IOX1 effect on the P-gp and PD-L1 expression in JMJD1A-knockdown HCT116 cells.** **a**, Western blotting images and **b**, their quantification; JMJD1A-knockdown HCT116 cells were treated with IOX1 (5, 25, or 50  $\mu$ M) for 24 h.  $n = 3$  independent experiments. Data represent mean  $\pm$  SD. Two-tailed Student's  $t$ -test. NS, no significance; \*\*\*  $P < 0.001$ . Source data are provided as a Source Data file.

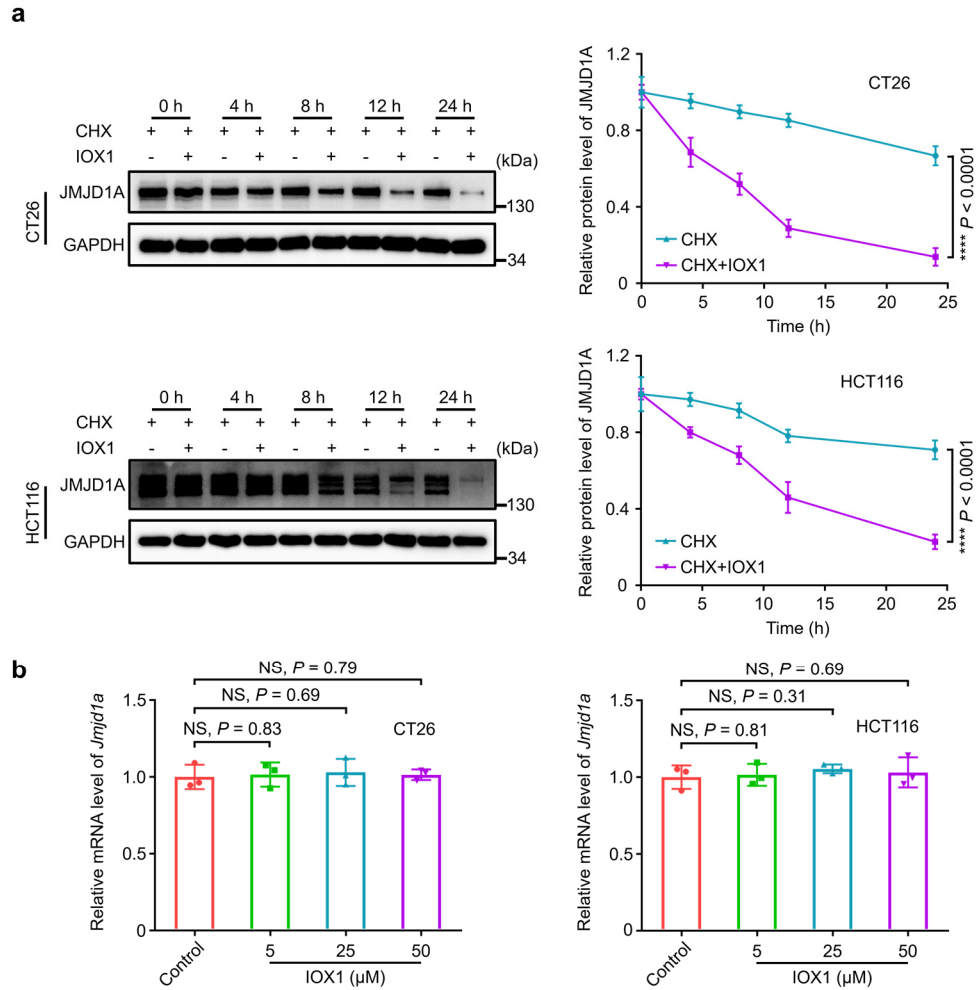

**Supplementary Fig. 50. IOX1 treatment reduces the stability of JMJD1A protein.** **a**, Western blotting images and their quantification of JMJD1A expression in CT26 or HCT116 cells at different times after treating with cycloheximide (CHX, 50  $\mu$ g ml<sup>-1</sup>) and IOX1 (50  $\mu$ M);  $n = 3$  independent experiments. **b**, The *Jmjd1a* mRNA levels of CT26 or HCT116 cells after treating with IOX1 (5, 25, or 50  $\mu$ M) for 24 h analyzed by qPCR;  $n = 3$  independent experiments. Data represent mean  $\pm$  SD. Two-tailed Student's *t*-test. NS, no significance; \*\*\*\*  $P < 0.0001$ . Source data are provided as a Source Data file.



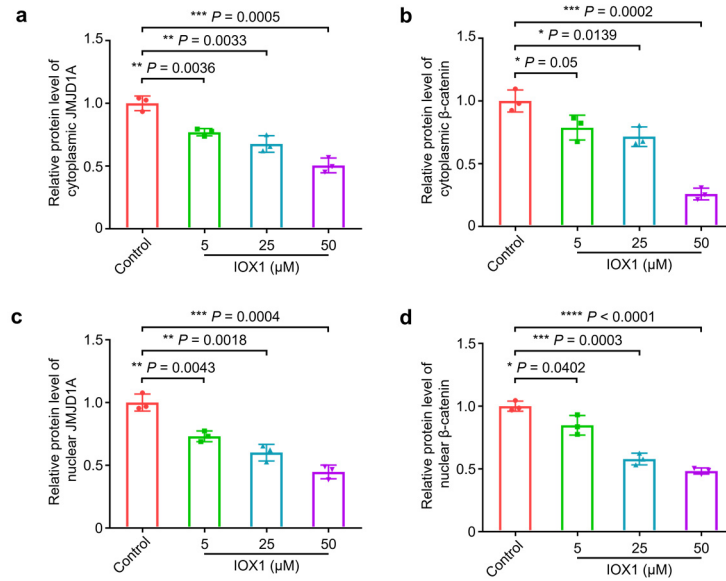

**Supplementary Fig. 51. JMJD1A and β-catenin levels in IOX1-treated CT26 cells.**

Quantification by western blotting of **a**, cytoplasmic JMJD1A, **b**, cytoplasmic β-catenin, **c**, nuclear JMJD1A and **d**, nuclear β-catenin in CT26 cells after treating for 24 h with IOX1 (5, 25, or 50 μM).  $n = 3$  independent experiments. Data represent mean  $\pm$  SD. Two-tailed Student's *t*-test. \*  $P < 0.05$ , \*\*  $P < 0.01$ , \*\*\*  $P < 0.001$ , \*\*\*\*  $P < 0.0001$ . See Fig. 4h in the text for images and other conditions. Source data are provided as a Source Data file.

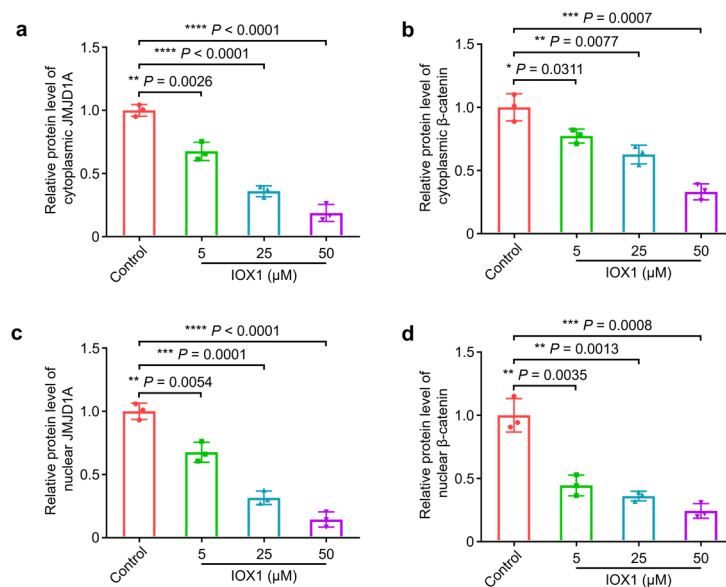

**Supplementary Fig. 52. JMJD1A and β-catenin levels in IOX1-treated HCT116 cells.**

Quantification by western blotting of **a**, cytoplasmic JMJD1A, **b**, cytoplasmic β-catenin, **c**, nuclear JMJD1A and **d**, nuclear β-catenin in HCT116 cells after treating for 24 h with IOX1 (5, 25, or 50 μM).  $n = 3$  independent experiments. Data represent mean  $\pm$  SD. Two-tailed Student's *t*-test. \*  $P < 0.05$ , \*\*  $P < 0.01$ , \*\*\*  $P < 0.001$ , \*\*\*\*  $P < 0.0001$ . See Fig. 4i in the text for images and other conditions. Source data are provided as a Source Data file.

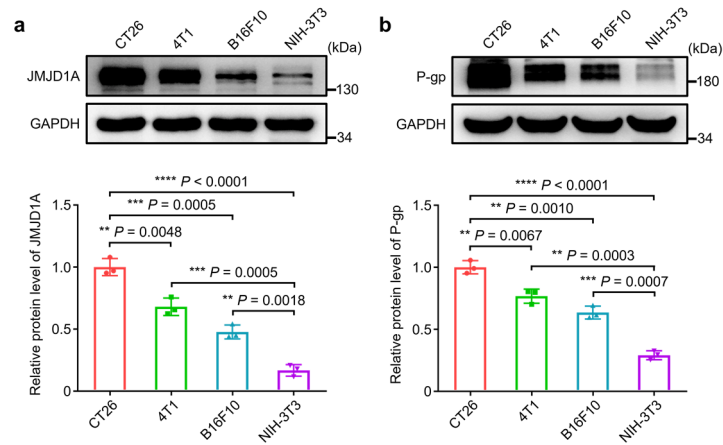

**Supplementary Fig. 53. JMJD1A and P-gp levels in untreated murine cell lines.** Western blotting images and their quantification of **a**, JMJD1A and **b**, P-gp expression.  $n = 3$  independent experiments. Data represent mean  $\pm$  SD. Two-tailed Student's  $t$ -test. \*\*  $P < 0.01$ , \*\*\*  $P < 0.001$ , \*\*\*\*  $P < 0.0001$ . Source data are provided as a Source Data file.

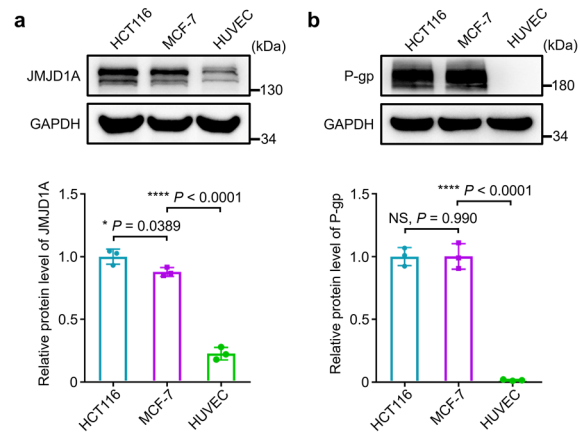

**Supplementary Fig. 54. JMJD1A and P-gp levels in untreated human cell lines.** Western blotting images and their quantification of **a**, JMJD1A and **b**, P-gp expression in human cell lines.  $n = 3$  independent experiments. Data represent mean  $\pm$  SD. Two-tailed Student's  $t$ -test. \*  $P < 0.05$ , \*\*\*\*  $P < 0.0001$ . Source data are provided as a Source Data file.

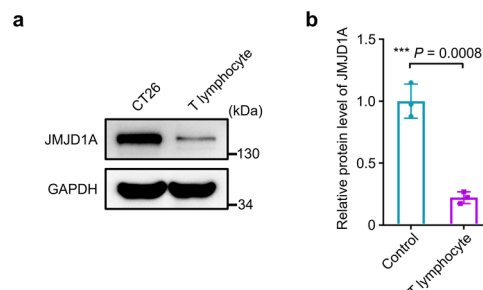

**Supplementary Fig. 55. JMJD1A expression in untreated CT26 cells or T lymphocytes.** **a**, Western blotting images and **b**, their quantification.  $n = 3$  independent experiments. Data represent mean  $\pm$  SD. Two-tailed Student's  $t$ -test. \*\*\*  $P < 0.001$ . Source data are provided as a Source Data file.

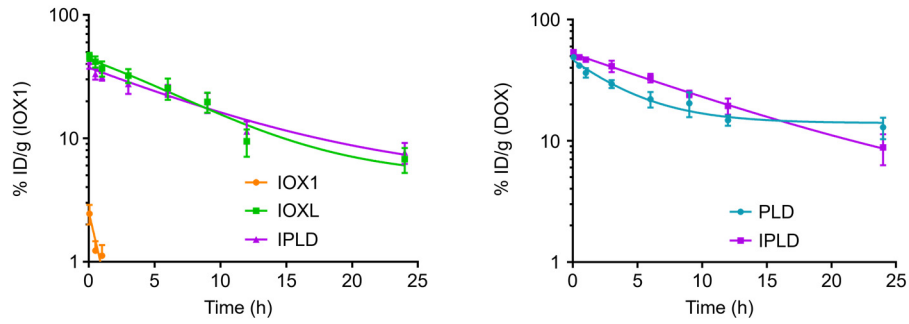

**Supplementary Fig. 56. The blood clearance curves in BALB/c mice.** Dose: IOX1-eq. 7.5 mg kg<sup>-1</sup>, DOX-eq. 5 mg kg<sup>-1</sup>; *n* = 3 mice. Data represent mean ± SD. Source data are provided as a Source Data file.

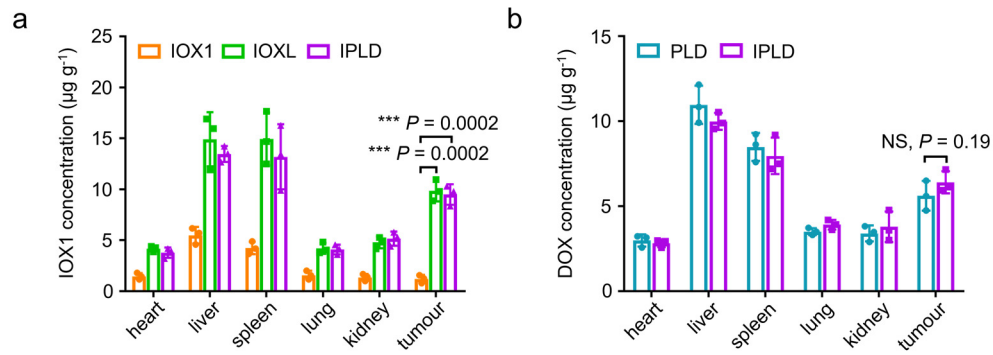

**Supplementary Fig. 57. Biodistribution of IOX1 and DOX in s.c. CT26 tumour-bearing mice.** **a**, The IOX1 and **b**, DOX concentrations in tumours and main organs of mice at 24 h post-intravenous injection of different formulations. Dose: IOX1-eq. 7.5 mg kg<sup>-1</sup>, DOX-eq. 5 mg kg<sup>-1</sup>; *n* = 3 mice. Data represent mean ± SD. Two-tailed Student's *t*-test. NS, no significance; \*\*\* *P* < 0.001. Source data are provided as a Source Data file.

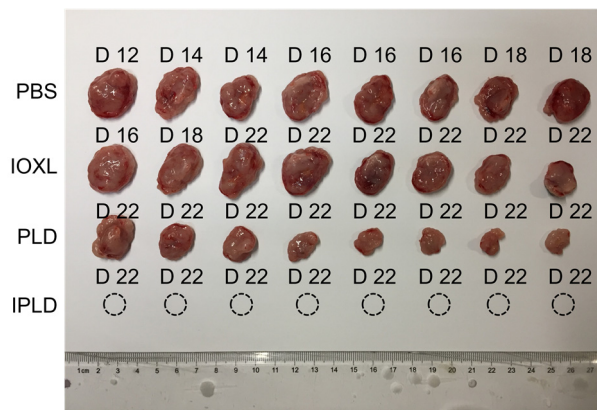

**Supplementary Fig. 58. Images of the tumours from the treated s.c. 80 mm<sup>3</sup> CT26 tumour-bearing BALB/c mice in Figs. 5a-e.** The tumours were harvested at the experimental endpoint (Day 22) or at the indicated days when reaching the allowed maximum.

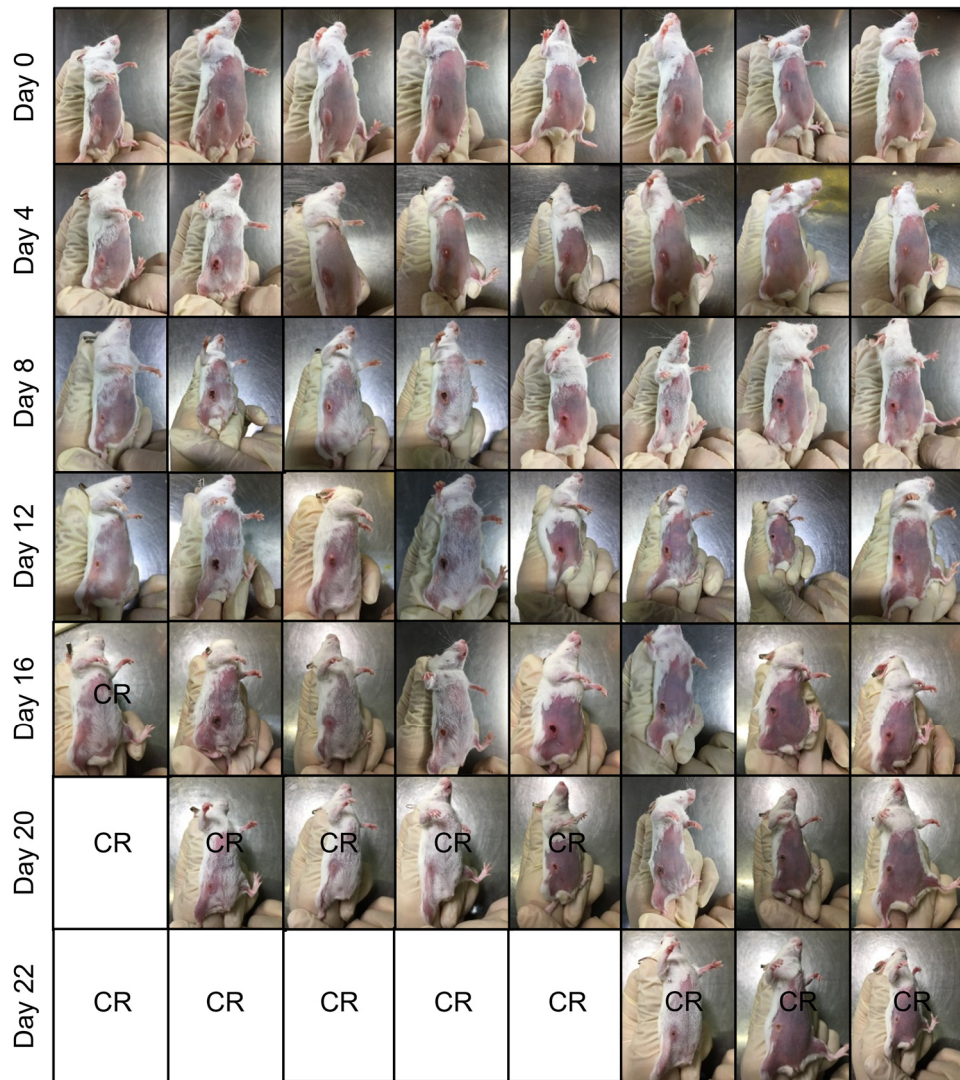

**Supplementary Fig. 59.** Photographs of the s.c. 80 mm<sup>3</sup> CT26 tumour-bearing BALB/c mice treated with IPLD during the experiment. CR: complete response. See Figs. 5a-g in the text for other conditions.

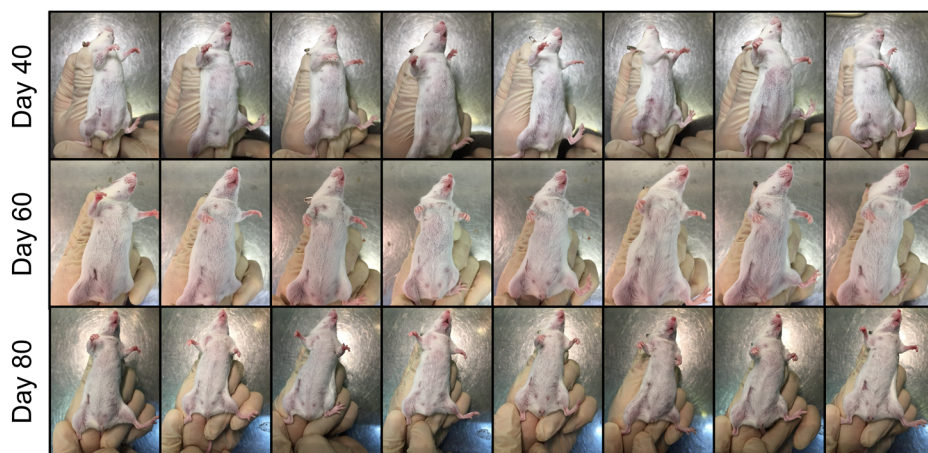

**Supplementary Fig. 60.** The follow-up tracking of the IPLD-treated s.c. 80 mm<sup>3</sup> CT26 tumour-bearing BALB/c mice. See Figs. 5a-g in the text for other conditions.

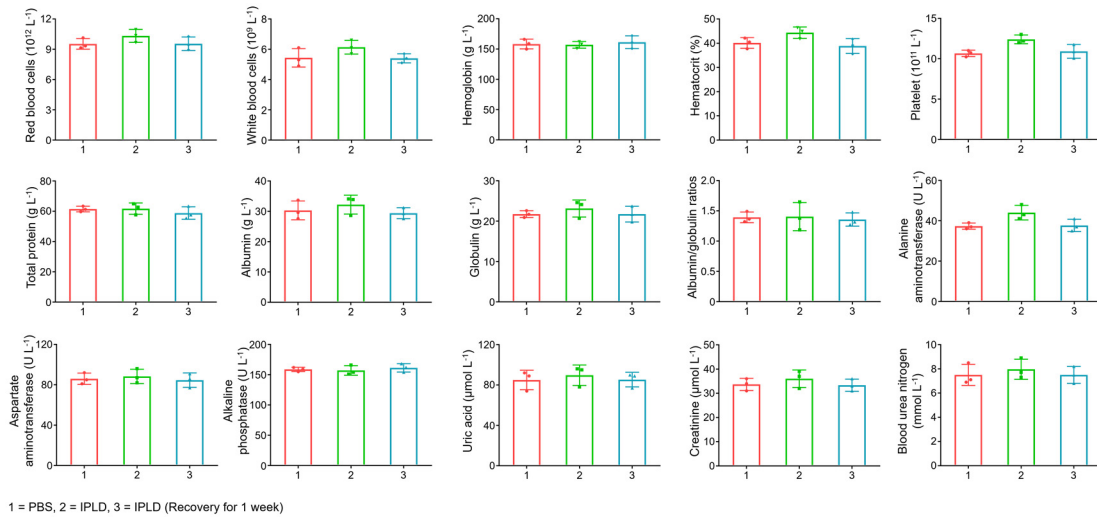

**Supplementary Fig. 61. Blood biochemistry of the BALB/c mice after different treatments.** Dose: IOX1-eq.  $7.5 \text{ mg kg}^{-1}$ , DOX-eq.  $5 \text{ mg kg}^{-1}$  for 4 times; The blood was collected on the day after the last treatment or 7 days post-recovery.  $n = 3$  mice. Data represent mean  $\pm$  SD. Source data are provided as a Source Data file.

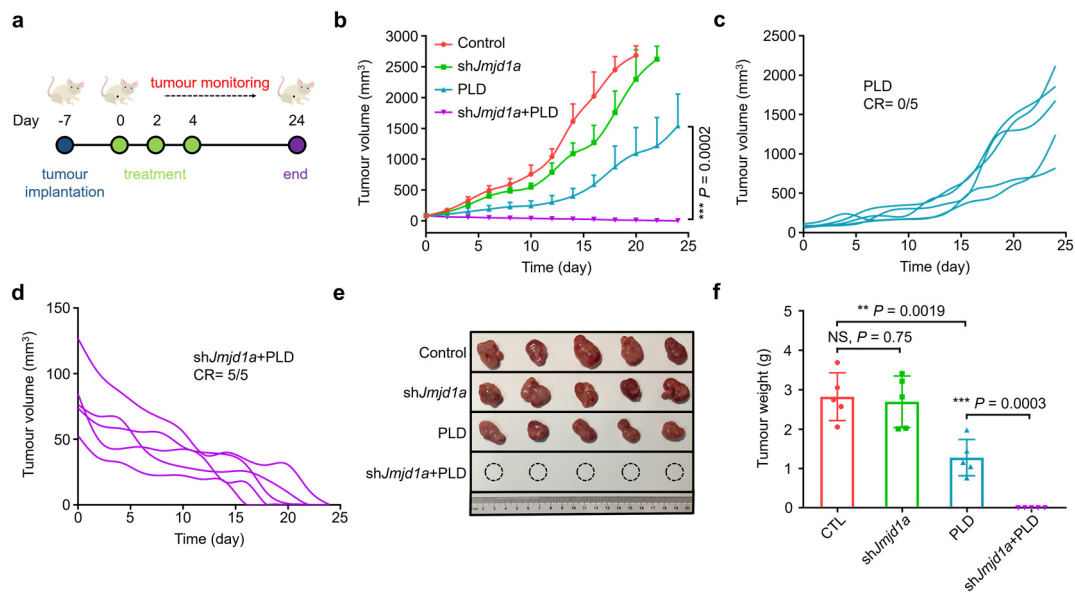

**Supplementary Fig. 62. PLD treatment of s.c. JMJD1A-knockdown CT26 tumours.** **a**, Experimental schedule; After 7 days of s.c. inoculation with  $5 \times 10^5$  control or JMJD1A-knockdown CT26 cells, the tumours reached about  $80 \text{ mm}^3$ ; the treatment was initiated (noted as Day 0) via the tail vein injection with PBS or PLD at  $5 \text{ mg kg}^{-1}$  DOX on every 2 days for 3 times. **b**, The tumour growth curves;  $n = 5$  mice. **c,d**, The individual tumour growth curves of the PLD group or the shJMJD1A+PLD group in **b**; CR: complete response. **e**, The images of the tumours dissected at the end of experiment. **f**, The averaged tumour weight of each group on Day 24;  $n = 5$  mice. Data represent mean  $\pm$  SD. Two-tailed Student's *t*-test. NS, no significance; \*\*  $P < 0.01$ , \*\*\*  $P < 0.001$ . Source data are provided as a Source Data file.

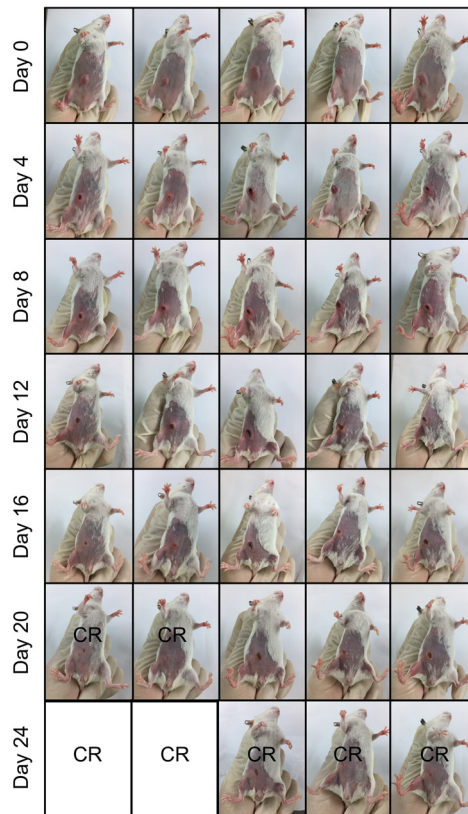

**Supplementary Fig. 63.** Photographs of the s.c. 80 mm<sup>3</sup> JMJD1A-knockdown CT26 tumour-bearing BALB/c mice treated with PLD during the experiment. CR: complete response. See Supplementary Fig. 62 for other conditions.

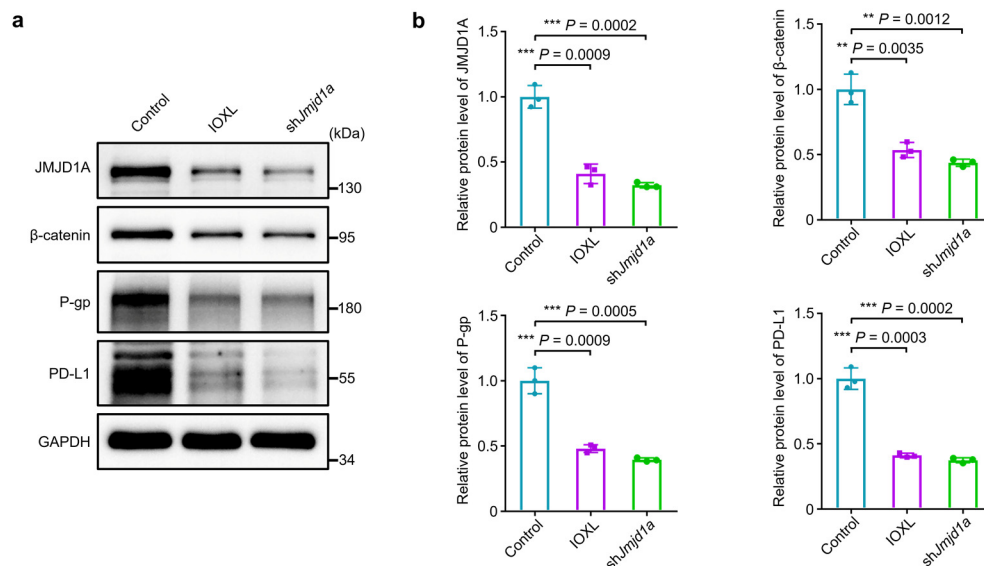

**Supplementary Fig. 64.** JMJD1A, β-catenin, P-gp and PD-L1 expression in the IOXL-treated CT26 tumours or JMJD1A-knockdown CT26 tumours. **a**, Western blotting images and **b**, their quantification;  $n = 3$  mice. Data represent mean  $\pm$  SD. Two-tailed Student's  $t$ -test. \*\*  $P < 0.01$ , \*\*\*  $P < 0.001$ . See Fig. 5a & Supplementary Fig. 62 for other conditions. Source data are provided as a Source Data file.

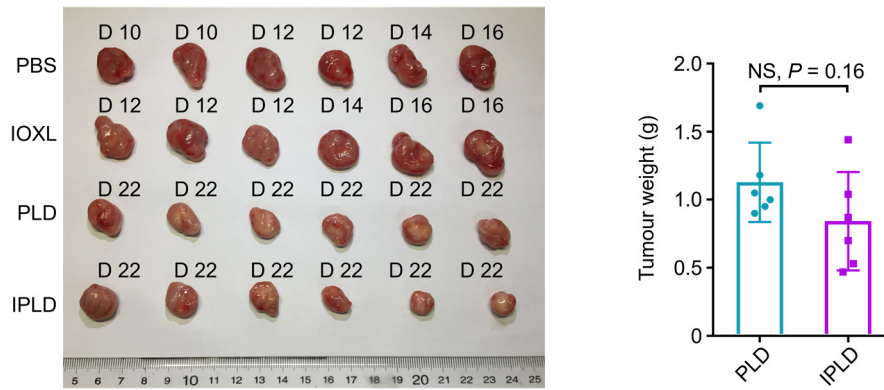

**Supplementary Fig. 65. Images and the average tumour weights of the tumours from the treated s.c. 80 mm<sup>3</sup> CT26 tumour-bearing BALB/c nude mice in Fig. 5h.** The tumours were harvested at the experimental endpoint (Day 22) or at the indicated days when reaching the allowed maximum.  $n = 6$  mice. Two-tailed Student's t-test. NS, no significance. See Fig. 5h in the text for other conditions. Source data are provided as a Source Data file.

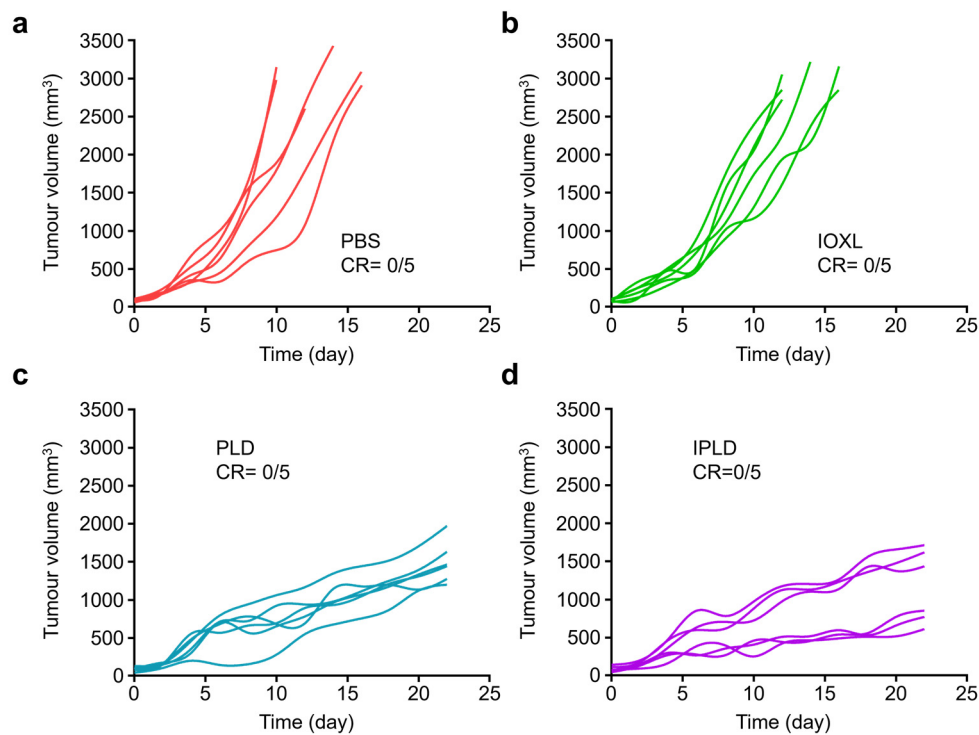

**Supplementary Fig. 66. The individual tumour growth curves of the s.c. 80 mm<sup>3</sup> CT26 tumour-bearing nude mice after treatments.** Mice were treated with **a**, PBS, **b**, IOXL (IOX1, 7.5 mg kg<sup>-1</sup>) **c**, PLD (DOX, 5 mg kg<sup>-1</sup>) or **d**, IPLD (IOX1, 7.5 mg kg<sup>-1</sup>; DOX 5 mg kg<sup>-1</sup>) for 3 times; ; CR: complete response. See Fig. 5h in the text for other conditions. Source data are provided as a Source Data file.

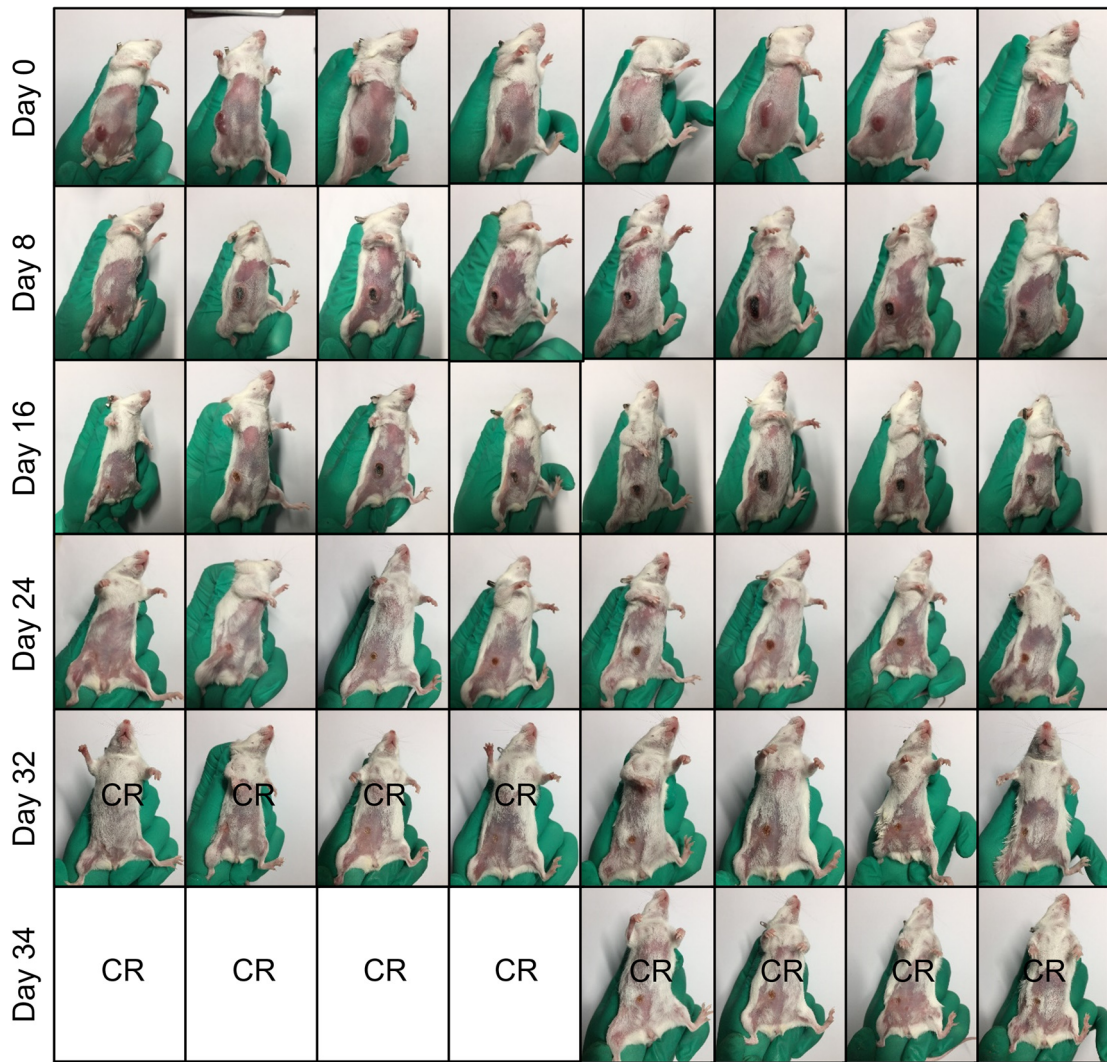

**Supplementary Fig. 67. Photographs of the s.c. 350 mm<sup>3</sup> CT26 tumour-bearing BALB/c mice treated with IPLD during the experiment. CR: complete response. See Figs. 5i-n in the text for other conditions.**

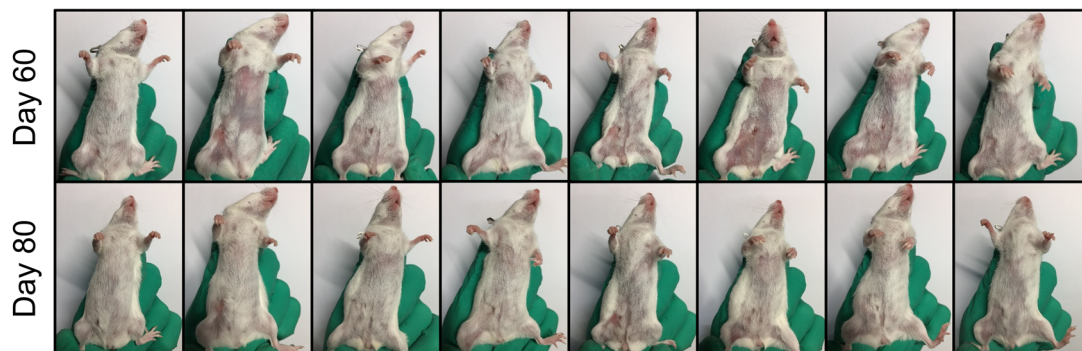

**Supplementary Fig. 68. The follow-up tracking of the IPLD-treated s.c. 350 mm<sup>3</sup> CT26 tumour-bearing BALB/c mice. See Figs. 5i-n in the text for other conditions.**



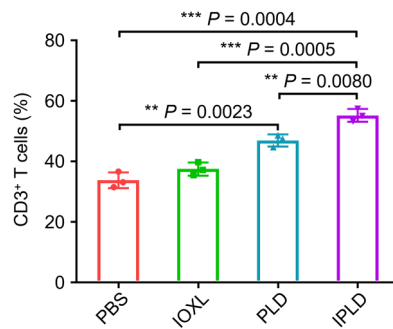

**Supplementary Fig. 69. Flow cytometric quantification of intratumoural CD3<sup>+</sup> T cells in the treated s.c. 80 mm<sup>3</sup> CT26 tumour-bearing BALB/c mice. *n* = 3 mice. Data represent mean ± SD. Two-tailed Student's *t*-test. \*\* *P* < 0.01, \*\*\* *P* < 0.001. See Fig. 6 in the text for other conditions. Source data are provided as a Source Data file.**

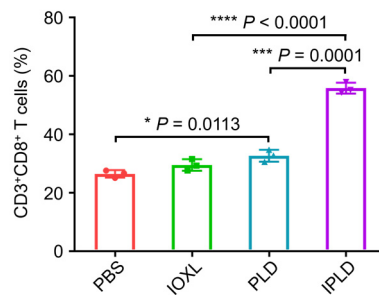

**Supplementary Fig. 70. Flow cytometric quantification of splenocytes' CD3<sup>+</sup>CD8<sup>+</sup> T cells in treated s.c. 80 mm<sup>3</sup> CT26 tumour-bearing BALB/c mice. *n* = 3 mice. Data represent mean ± SD. Two-tailed Student's *t*-test. \* *P* < 0.05, \*\*\* *P* < 0.001, \*\*\*\* *P* < 0.0001. See Fig. 6m in the text for contour diagrams and other conditions. Source data are provided as a Source Data file.**

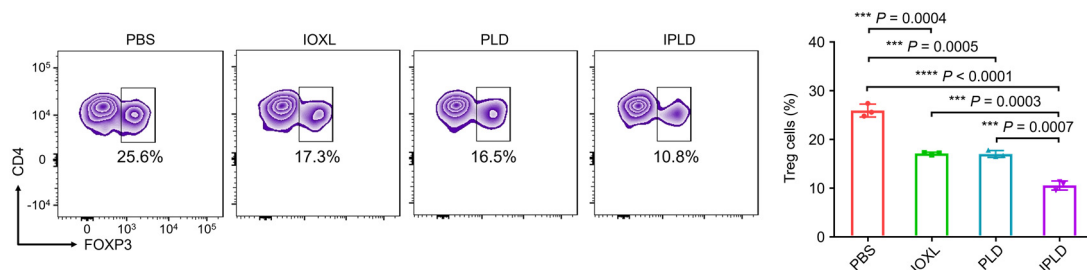

**Supplementary Fig. 71. Flow cytometry analysis and quantification of splenocytes' Treg cells in the treated s.c. 80 mm<sup>3</sup> CT26 tumour-bearing BALB/c mice. *n* = 3 mice. Data represent mean ± SD. Two-tailed Student's *t*-test. \*\*\* *P* < 0.001, \*\*\*\* *P* < 0.0001. See Fig. 6 in the text for other conditions. Source data are provided as a Source Data file.**

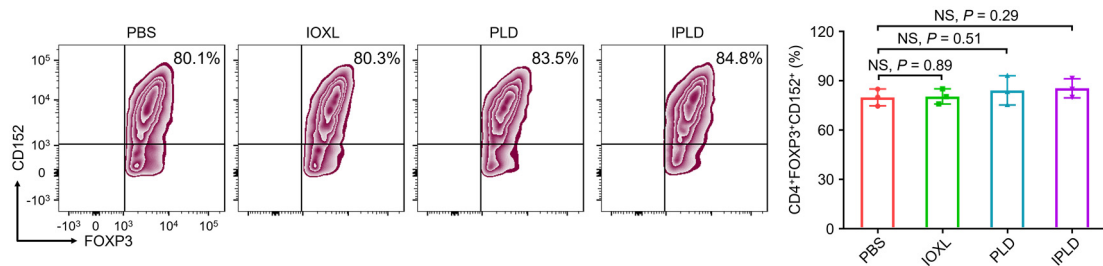

**Supplementary Fig. 72. Flow cytometry analysis and quantification of CTLA-4 expression in intratumoural Treg cells in the treated s.c. 80 mm<sup>3</sup> CT26 tumour-bearing BALB/c mice. *n* = 3 mice. Two-tailed Student's *t*-test. NS, no significance. See Fig. 6 in the text for other conditions. Source data are provided as a Source Data file.**

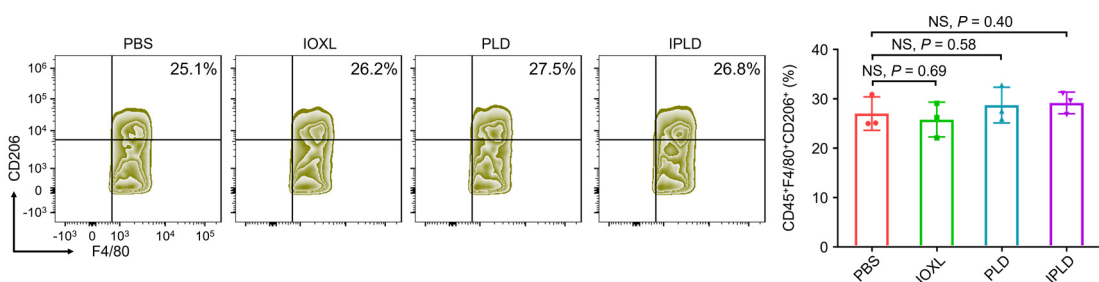

**Supplementary Fig. 73. Flow cytometry analysis and quantification of tumour associated M2 macrophages in the treated s.c. 80 mm<sup>3</sup> CT26 tumour-bearing BALB/c mice. *n* = 3 mice. Two-tailed Student's *t*-test. NS, no significance. See Fig. 6 in the text for other conditions. Source data are provided as a Source Data file.**

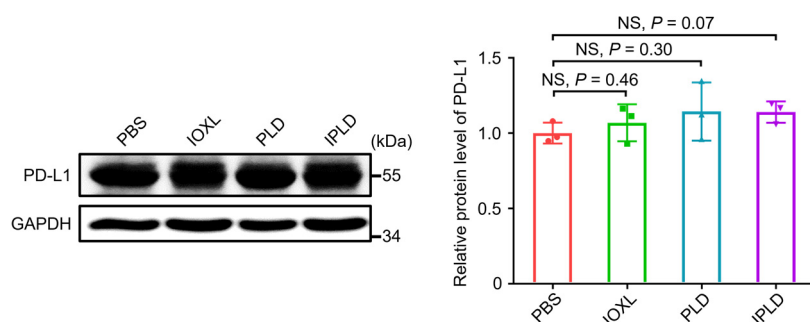

**Supplementary Fig. 74. Western blotting images and their quantification of PD-L1 expression in pancreas in the s.c. 80 mm<sup>3</sup> CT26 tumour-bearing BALB/c mice after different treatments. *n* = 3 mice. Two-tailed Student's *t*-test. NS, no significance. See Fig. 6 in the text for other conditions. Source data are provided as a Source Data file.**

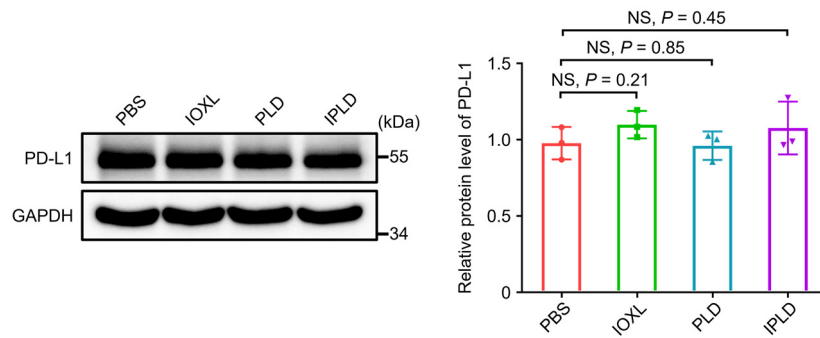

**Supplementary Fig. 75. Western blotting images and their quantification of PD-L1 expression in lungs in the s.c. 80 mm<sup>3</sup> CT26 tumour-bearing BALB/c mice after different treatments. *n* = 3 mice. Two-tailed Student's *t*-test. NS, no significance. See Fig. 6 in the text for other conditions. Source data are provided as a Source Data file.**

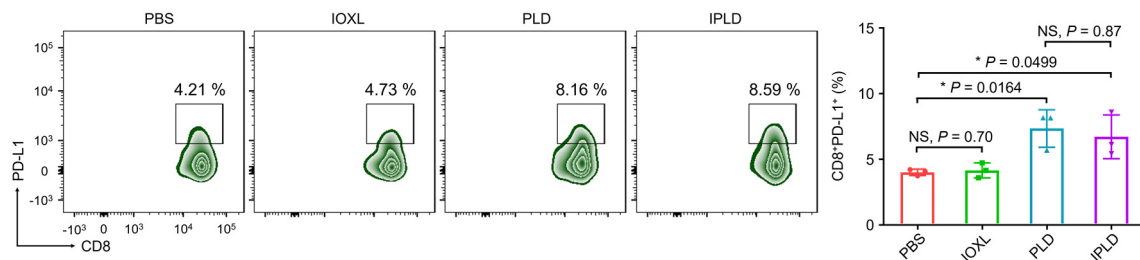

**Supplementary Fig. 76. Flow cytometry analysis of intratumour CD8<sup>+</sup>PD-L1<sup>+</sup> T cells in the s.c. 80 mm<sup>3</sup> CT26 tumour-bearing BALB/c mice after different treatments. *n* = 3 mice. Two-tailed Student's *t*-test. NS, not significant; \* *P* < 0.05. See Fig. 6 in the text for other conditions. Source data are provided as a Source Data file.**

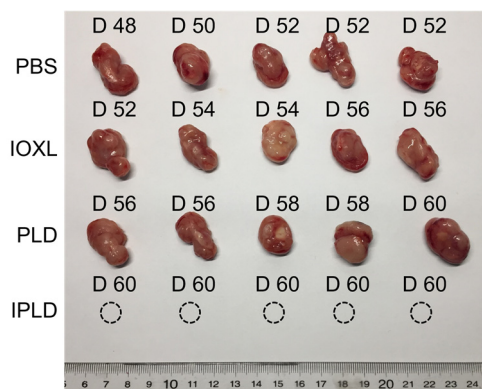

**Supplementary Fig. 77. Images of the rechallenged tumours harvested on the indicated days or at the experimental endpoint (Day 60) from the s.c. CT26 rechallenged tumour-bearing BALB/c mice in Figs. 7a-c.**

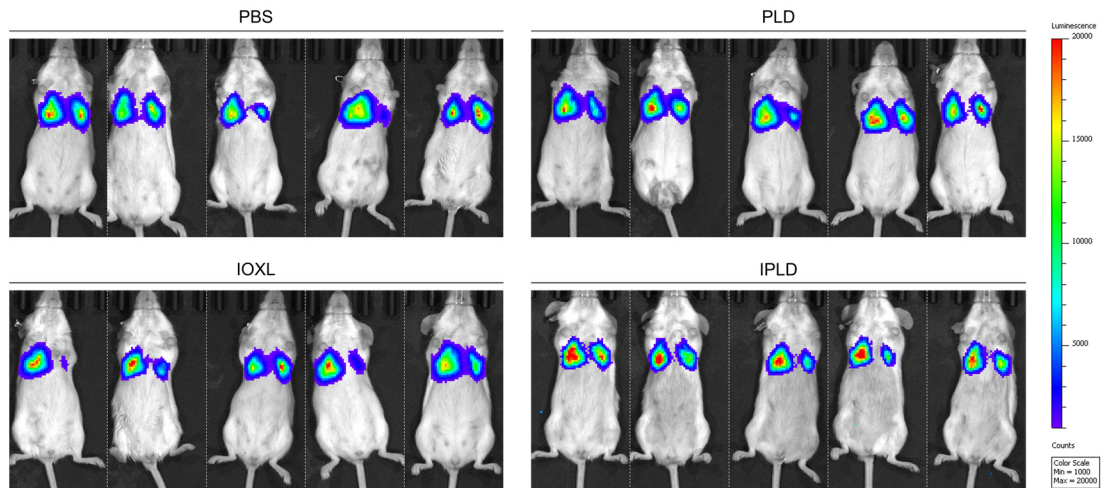

**Supplementary Fig. 78.** In vivo bioluminescence imaging of the lungs in anaesthetized mice immediately after i.v. injection of <sup>Luci</sup>CT26 cells. *n* = 5 mice. See Fig. 7e in the text for other conditions.

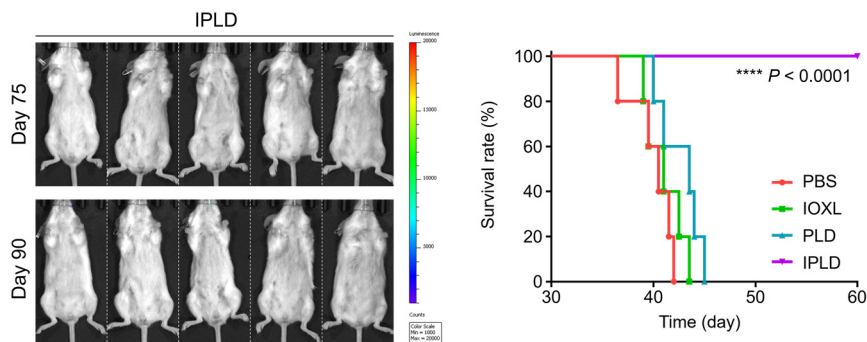

**Supplementary Fig. 79.** The follow-up tracking via in vivo bioluminescence imaging and the survival of the <sup>Luci</sup>CT26-rechallenged BALB/c mice. *n* = 5 mice. Statistical significance was analyzed by the log-rank (Mantel-Cox) test. \*\*\*\* *P* < 0.0001. See Fig. 7e in the text for other conditions. Source data are provided as a Source Data file.

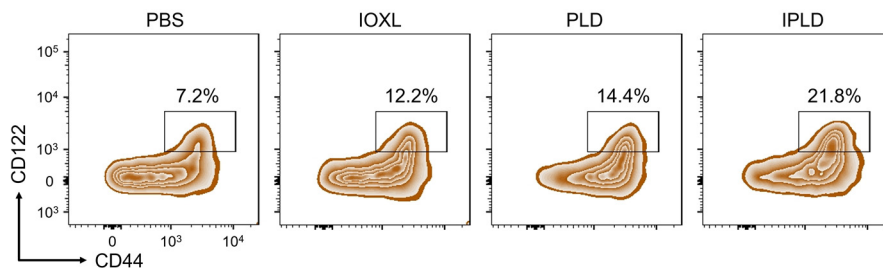

**Supplementary Fig. 80.** Flow cytometry analysis of splenocytes' CD4<sup>+</sup>CD44<sup>+</sup>CD122<sup>+</sup> T cells in the treated s.c. 80 mm<sup>3</sup> CT26 tumour-bearing BALB/c mice. The experiment was repeated independently three times to confirm the results. See Fig. 7d in the text for other conditions.

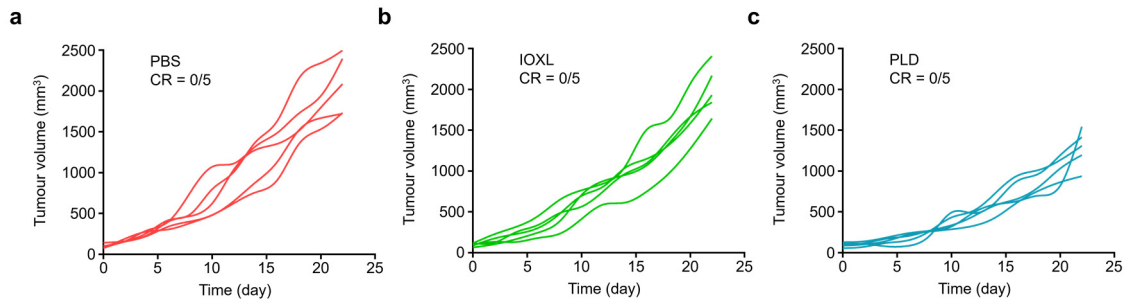

**Supplementary Fig. 81. The individual tumour growth curves of the 4T1 orthotopic tumour-bearing BALB/c mice after treatments. a, PBS, b, IOXL (IOX1, 7.5 mg kg<sup>-1</sup>) or c, PLD (DOX, 5 mg kg<sup>-1</sup>) for 3 times; CR: complete response. See Figs. 8a,c in the text for other conditions. Source data are provided as a Source Data file.**

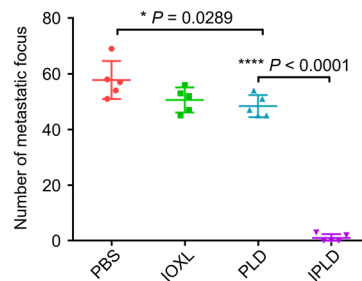

**Supplementary Fig. 82. The average numbers of lung metastatic nodules in the treated dual 4T1 tumour-bearing BALB/c mice. *n* = 5 mice. Data represent mean ± SD. Two-tailed Student's *t*-test. \* *P* < 0.05, \*\*\*\* *P* < 0.0001. See Fig. 8g in the text for images and other conditions. Source data are provided as a Source Data file.**

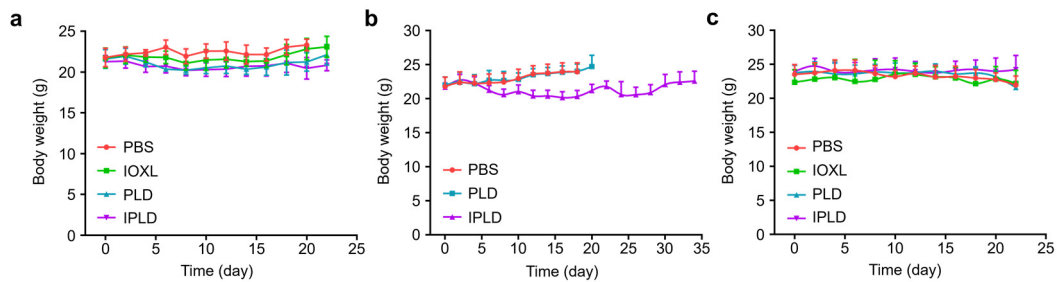

**Supplementary Fig. 83. Body weight changes of the mice after treatments. a, s.c. 80 mm<sup>3</sup> CT26 tumours (*n* = 8 mice), b, s.c. 350 mm<sup>3</sup> CT26 tumours (*n* = 8 mice), or c, 4T1 orthotopic tumours (*n* = 5 mice) with different treatments in Figs. 5a,i and Fig. 8a. Data represent mean ± SD. Source data are provided as a Source Data file.**

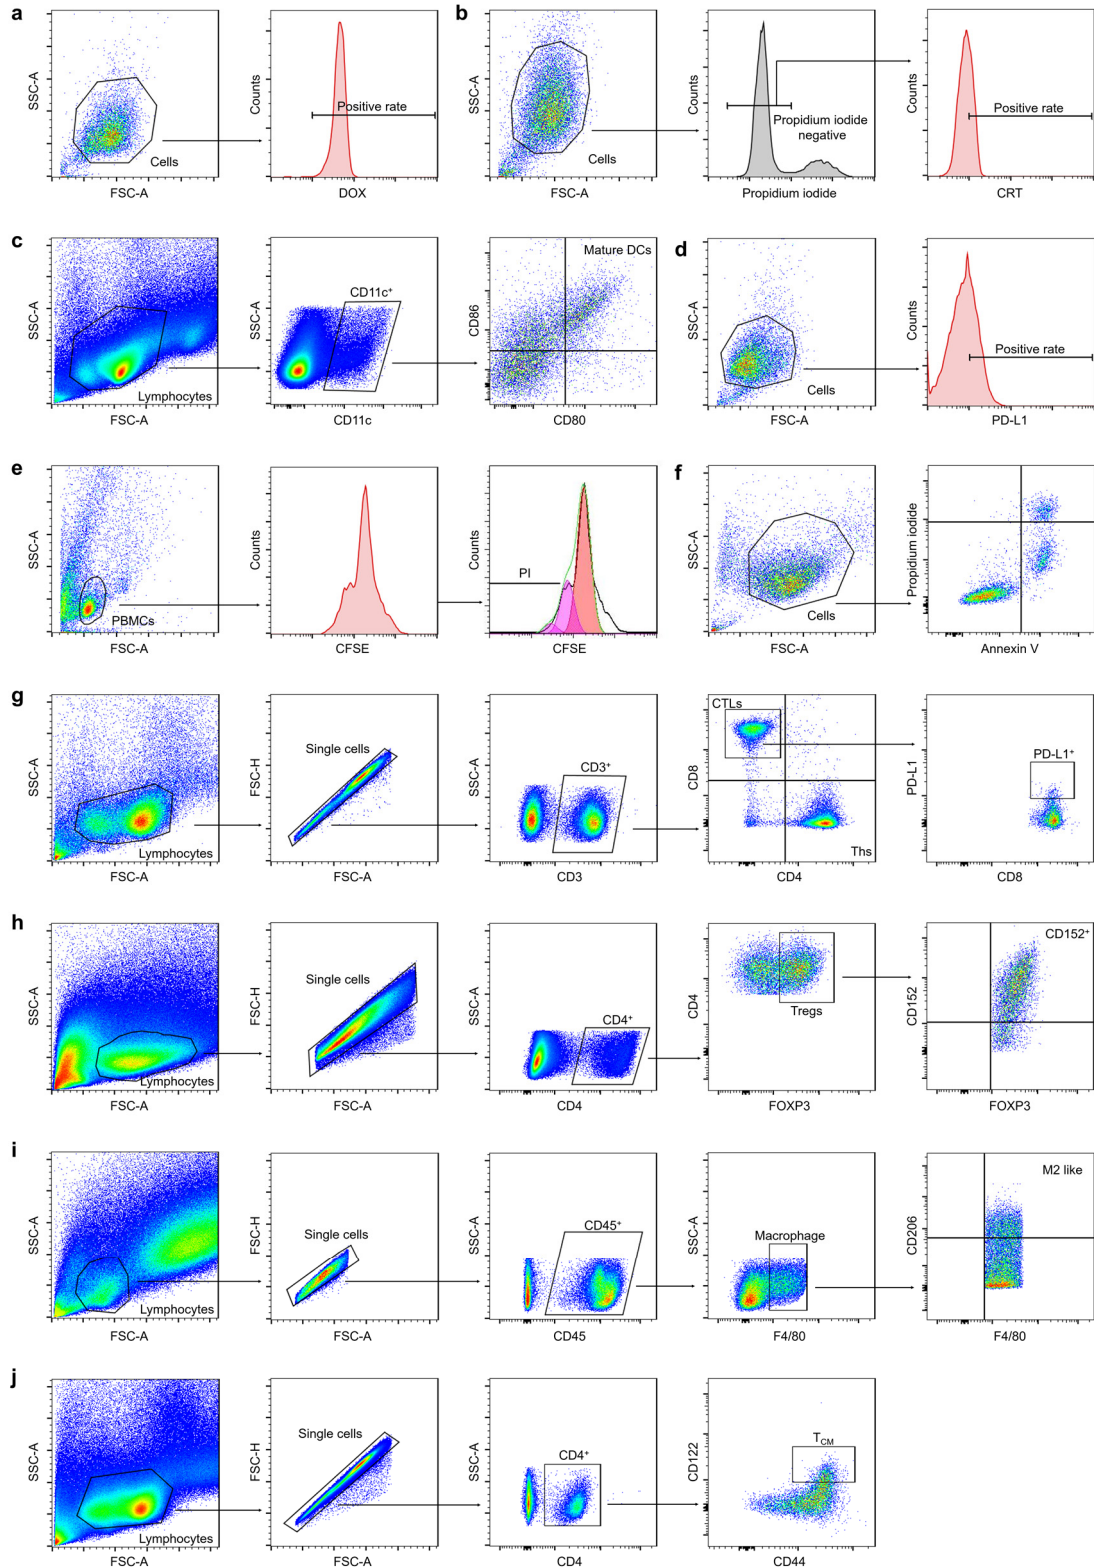

**Supplementary Fig. 84. Gating strategies for flow cytometry.** **a**, Gating strategy to determine DOX or rhodamine123 positive rate presented in Fig. 2e and Supplementary Figs. 9b,10b&d,11a, 12b&d,14b&d,15b&d,44a,45a. **b**, Gating strategy to determine CRT expression presented in Supplementary Figs. 19,23. **c**, Gating strategy to identify mature DCs presented on Figs. 3a,6d and Supplementary Figs. 27a,29a. **d**, Gating strategy to determine PD-L1 expression presented in Fig.

3d and Supplementary Figs. 31,33a,34,35a,46a,47a. **e**, Gating strategy to determine proliferation indices (PIs) of PBMC presented in Fig. 3g and Supplementary Figs. 37a,38a,40a. **f**, Gating strategy to determine apoptosis tumour cells presented on Fig. 3i and Supplementary Fig. 39a. **g**, Gating strategy to identify helper T cells (CD3<sup>+</sup>CD4<sup>+</sup>, Ths), cytotoxic T cells (CD3<sup>+</sup>CD8<sup>+</sup>, CTLs) and CD8<sup>+</sup>PD-L1<sup>+</sup> T cells presented on Figs. 6f&m and Supplementary Fig. 76. **h**, Gating strategy to identify regulatory T cells (CD4<sup>+</sup>FOXP3<sup>+</sup>, Tregs) and FOXP3<sup>+</sup>CD152<sup>+</sup> T cells presented on Fig. 6k and Supplementary Figs. 71,72. **i**, Gating strategy to identify tumour-associated M2 macrophages presented on Supplementary Fig. 73. **j**, Gating strategy to identify central memory T cells (T<sub>CM</sub>) presented on Supplementary Fig. 80.

**Supplementary Table 1. Primers (5'-3') used in this study.**

| Gene                                    | Forward                 | Reverse                 |
|-----------------------------------------|-------------------------|-------------------------|
| human <i>Jmjd1a</i>                     | CAGGAGCTCCACATCAGGTT    | TGCATCTTTCACATGCATGGT   |
| mouse <i>Jmjd1a</i>                     | TGAGTACACCAGGCGAGATG    | GGTCCCATATTTCCGATCCT    |
| human <i>Ctnnb1</i> ( $\beta$ -Catenin) | ACAAACTGTTTTGAAAATCCA   | CGAGTCATTGCATACTGTCC    |
| mouse <i>Ctnnb1</i> ( $\beta$ -Catenin) | TGACACCCAAGCCTTAGTAAACA | GTCTGTCAGATGAAGCCCCAGTG |
| human <i>Cd274</i> (PD-L1)              | ACAGCTGAATTGGTCATCCC    | TGTCAGTGCTACACCAAGGC    |
| mouse <i>Cd274</i> (PD-L1)              | GACCAGCTTTTGAAGGGAAATG  | CTGGTTGATTTGCGGTATGG    |
| human <i>Abcb1</i> (P-gp)               | GACATCCCAGTGCTTCAGG     | GCCACTGAACATTCAGTCG     |
| mouse <i>Abcb1</i> (P-gp)               | TACGACCCCATGGCTGGATC    | GGTAGCGAGTCGATGAACTG    |
| human <i>Gapdh</i>                      | AAGGTGAAGGTCGGAGTCAA    | AATGAAGGGGTCATTGATGG    |
| mouse <i>Gapdh</i>                      | GCATTGCCCTCAACGACCAC    | CCACCACCCTGTTGCTGTAG    |
